# Supplementary material for: Modulation of NOX2 causes obesity-mediated atrial fibrillation
Source: PubMed Central journal article supplement (PMC11405042; doi:10.1172/jci175447), 2024-08-15
Supplement: jci-134-175447-s127.pdf [file jci-134-175447-s127.pdf]

# Unedited Figure 7H- Pitx2 blot

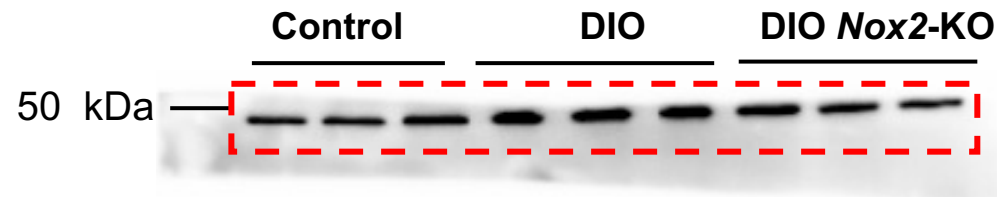

**Blot 1- Actin**

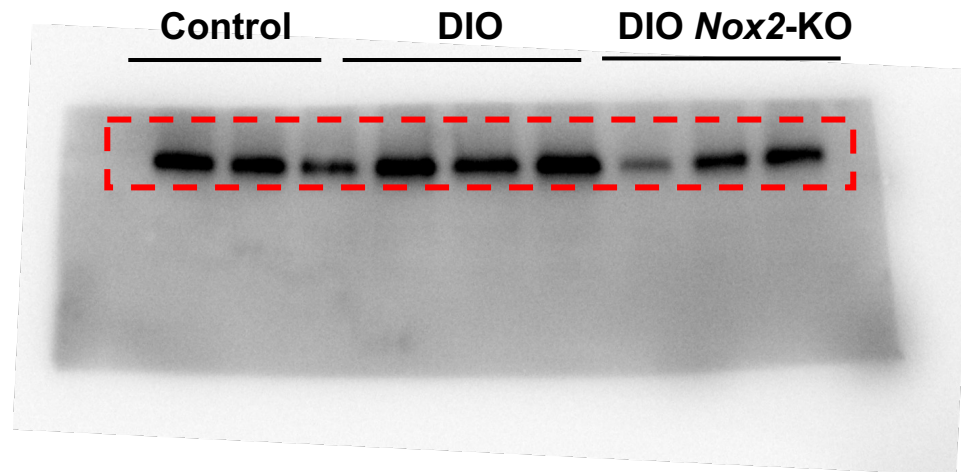

**Blot 1- Pitx2**

Red box refers to blot used in figure

# Unedited Figure S3D- Nav1.5

## blots

### Blot-1 Actin

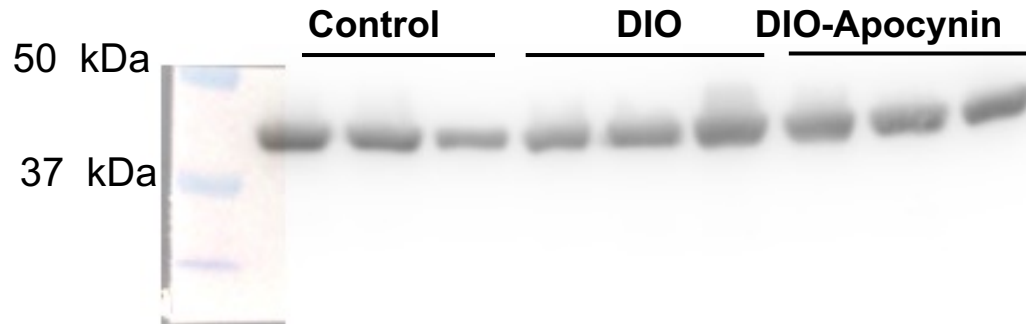

### Blot-2 Actin

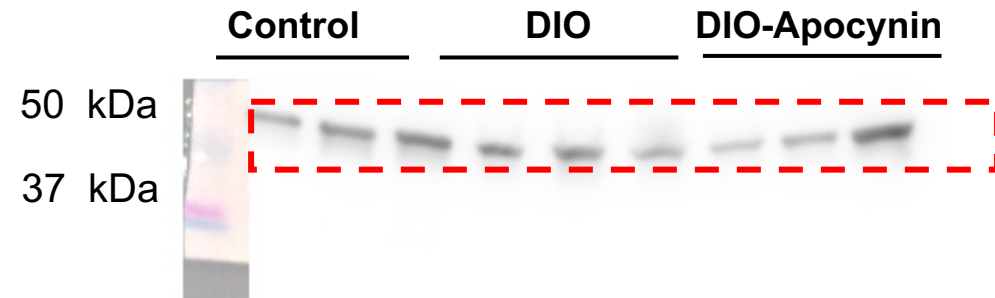

### Blot-1 Nav1.5

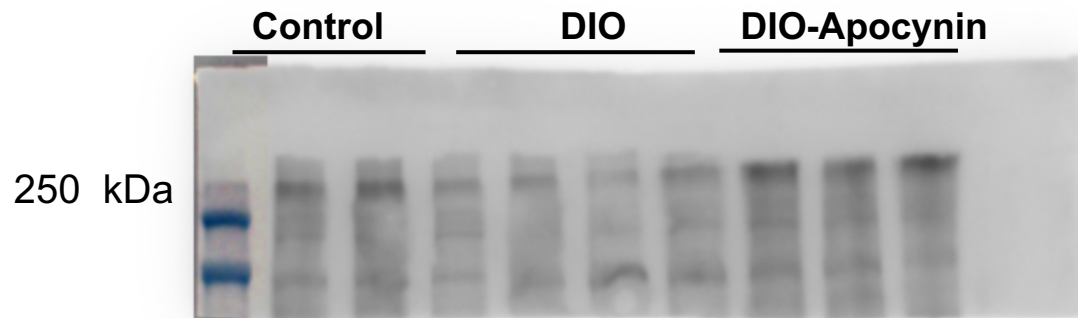

### Blot-2 Nav1.5

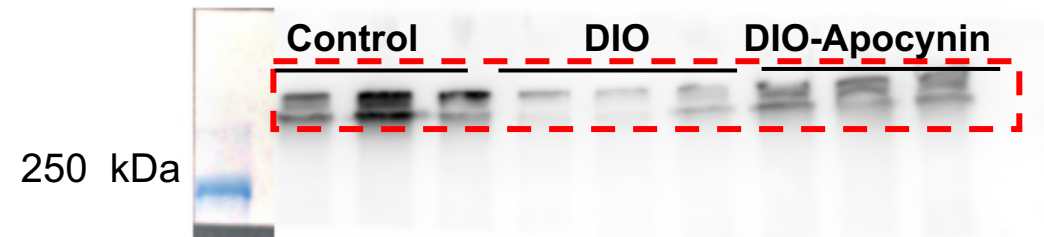

Red box refers to blot used in figure

# Unedited Figure S3D/E- Nav1.5

## blots

### Actin -1

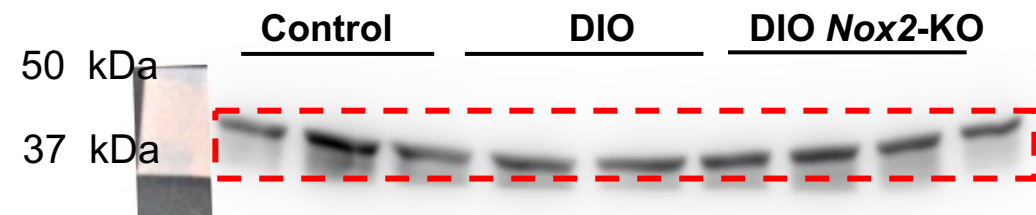

Control

DIO

DIO Nox2-KO

### Actin -2

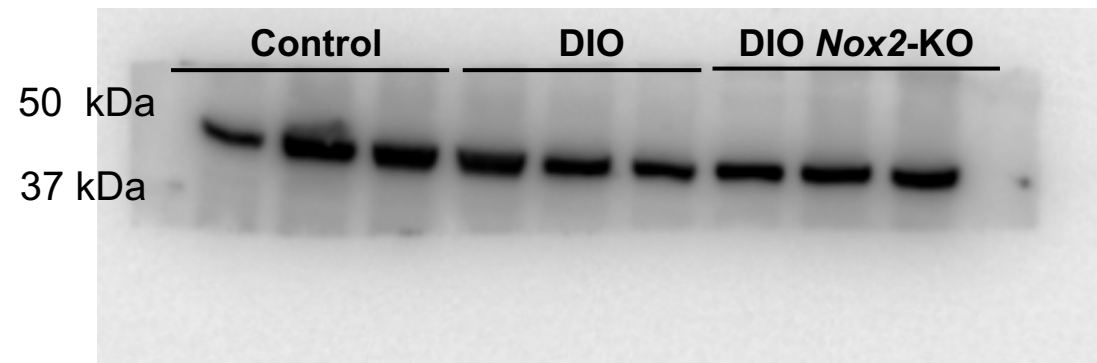

### Nav1.5-1

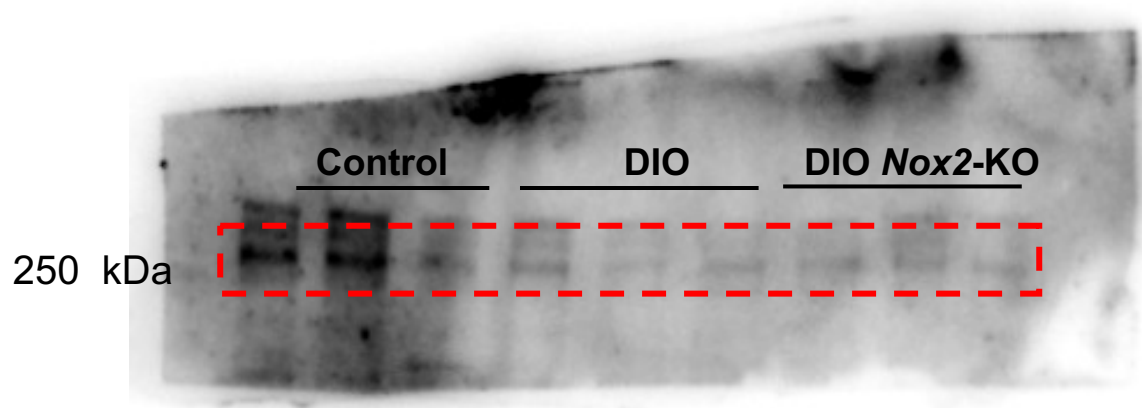

### Nav1.5-2

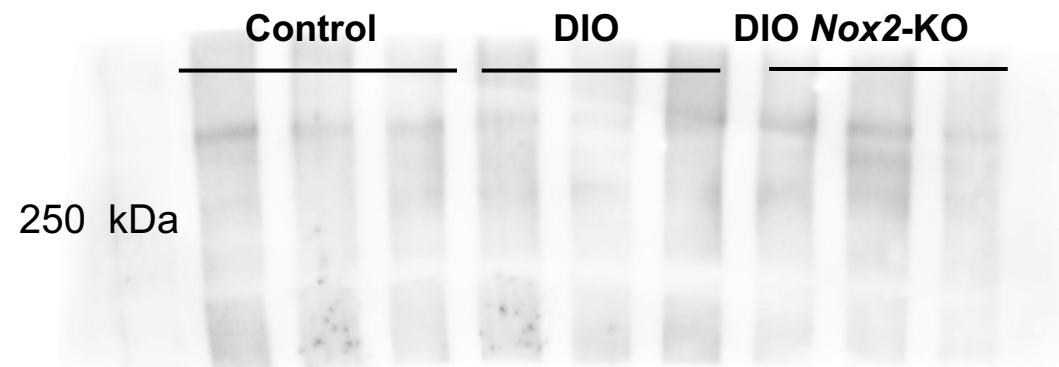

Red box refers to blot used in figure

# Unedited Figure S3G- PKC- $\alpha$ blots

Actin

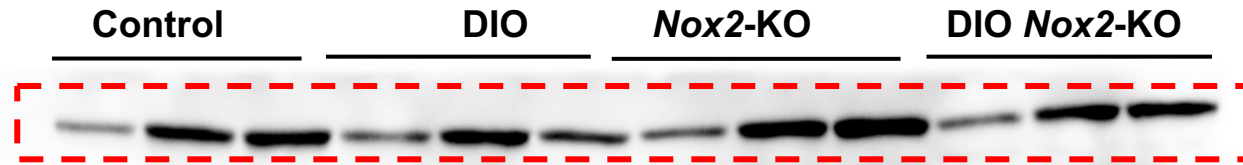

Pkc-a

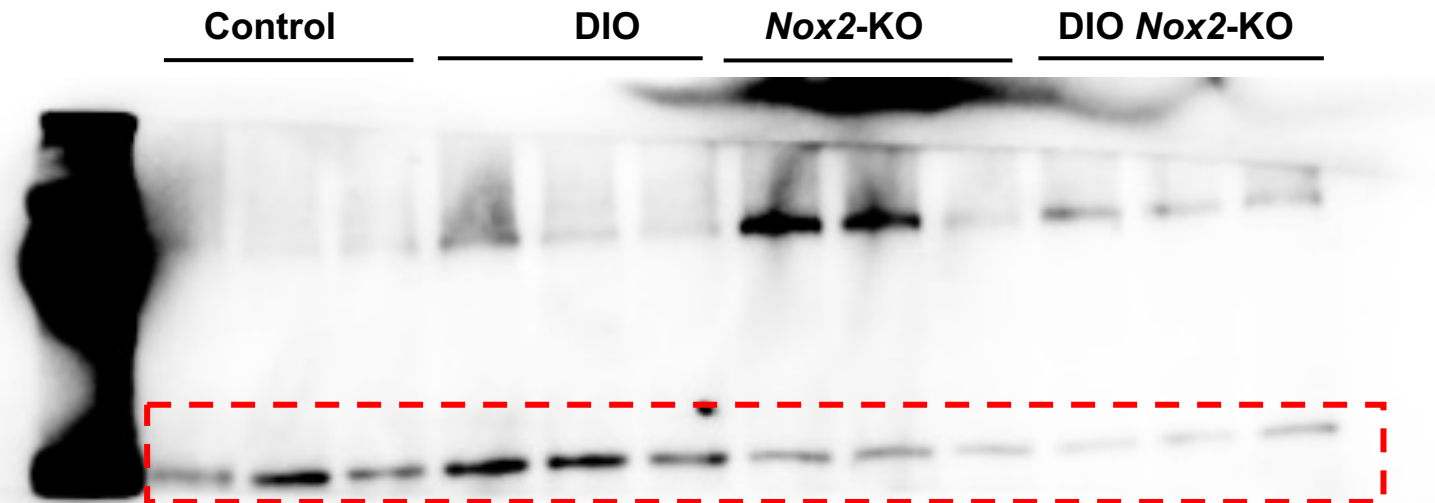

Red box refers to blot used in figure

# Unedited Figure S3H- PKC- $\delta$ blots

## Actin -1

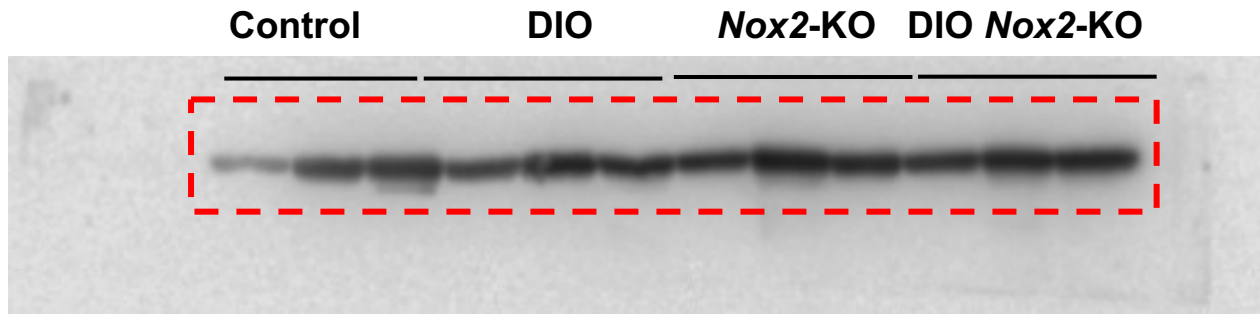

## Actin -2

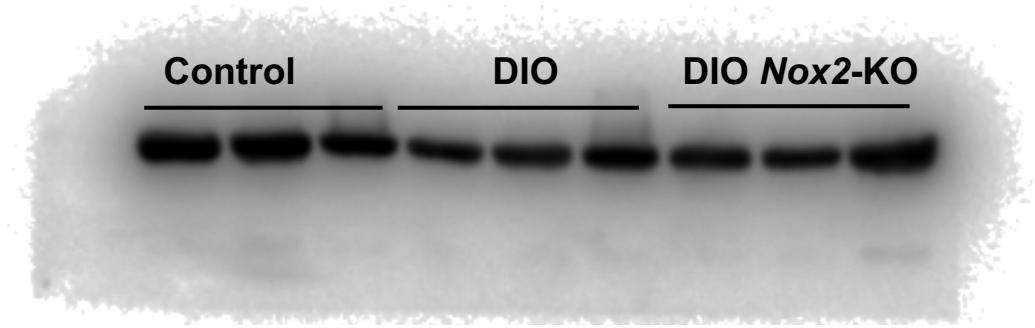

## Pkc-d-1

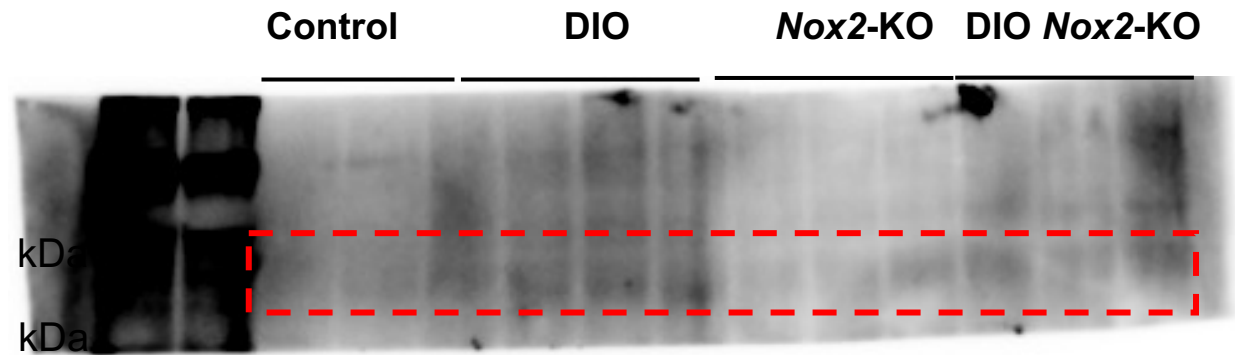

## Pkc-d-2

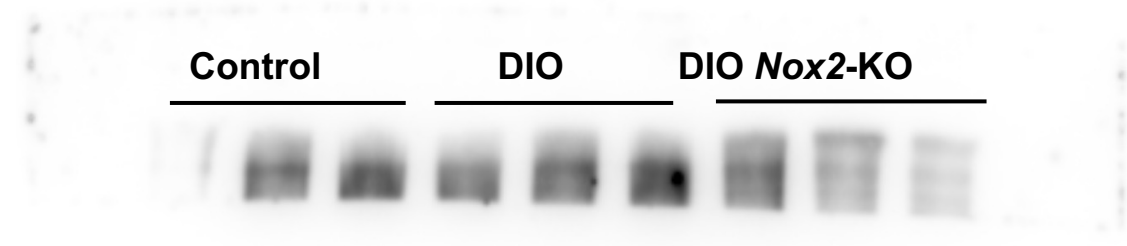

Red box refers to blot used in figure

# Unedited Figure S4C- Kv7.1 blots

**Actin -1**

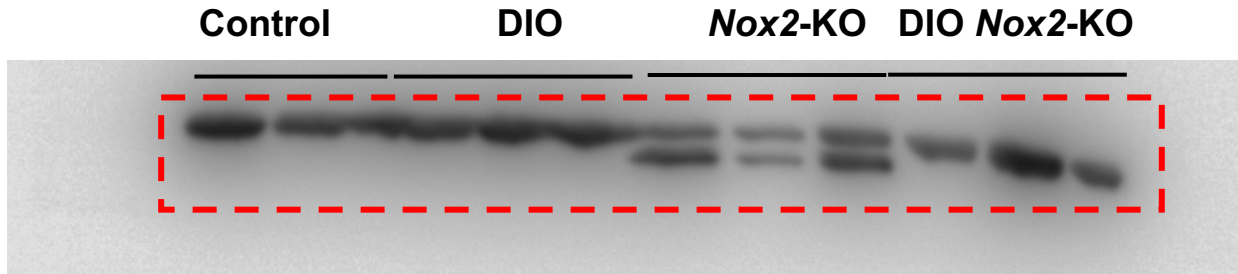

**Actin -2**

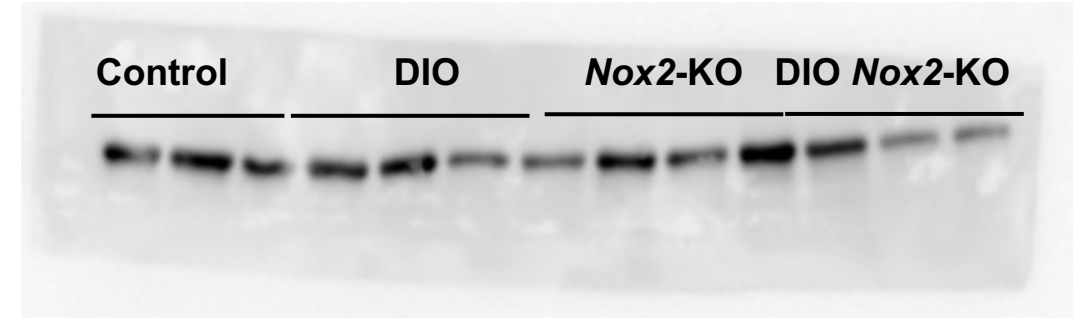

**Kv7.1-1**

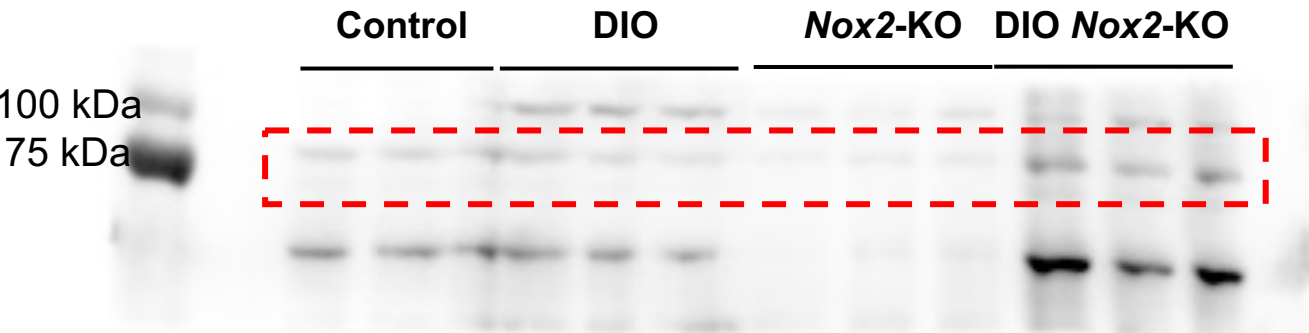

**Kv7.1-2**

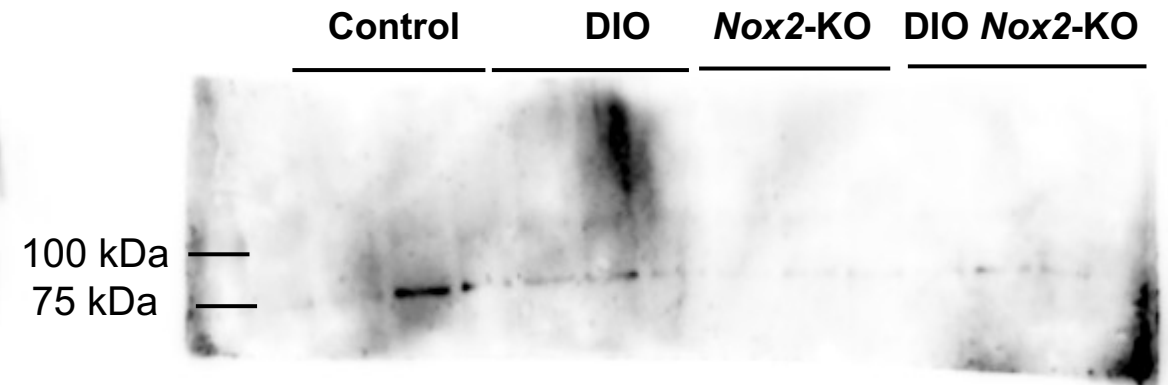

Red box refers to blot used in figure

# Unedited Figure S4D- MinK blots

## Actin -1

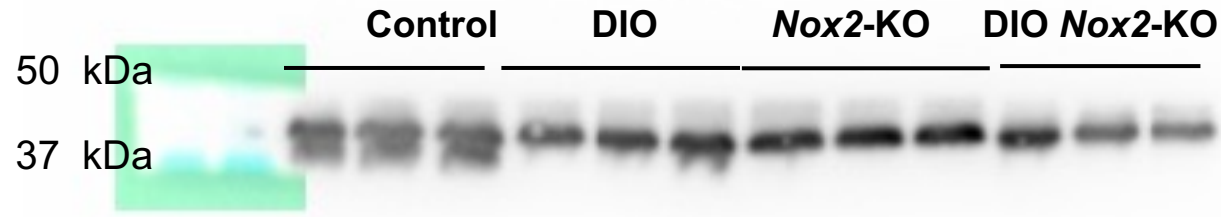

## Actin -2

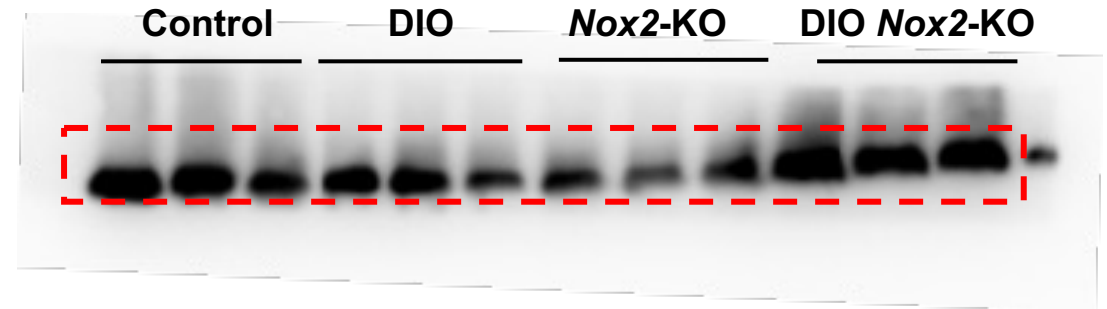

## MinK-1

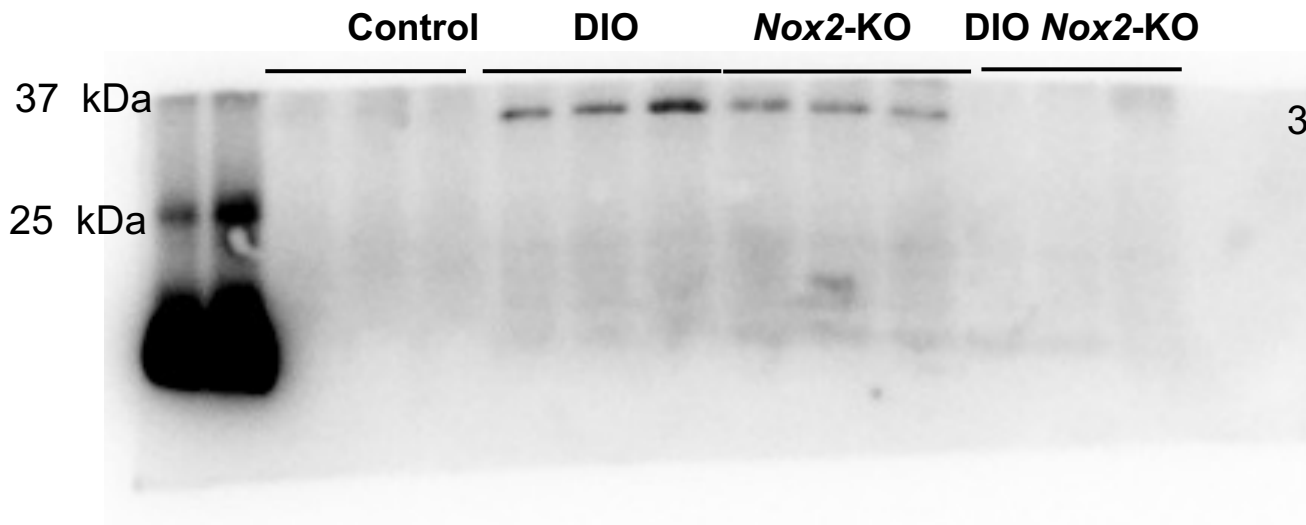

## MinK-2

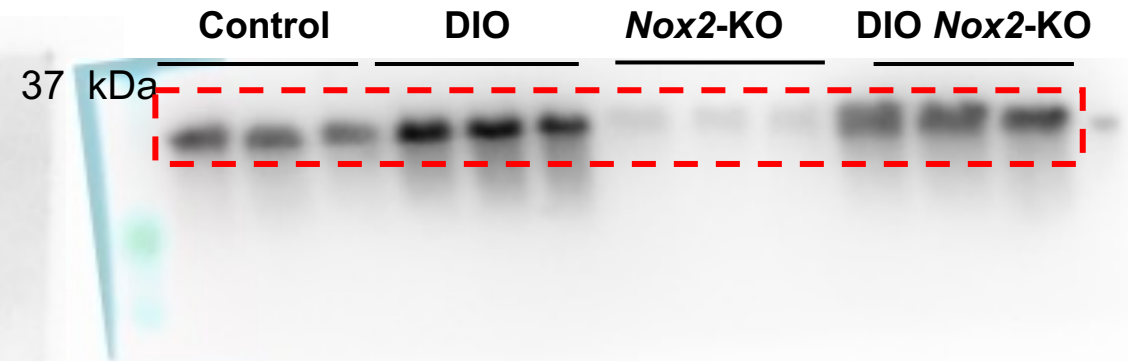

Red box refers to blot used in figure

# Unedited Figure S4E- Kv1.5 blots

**Actin -1**

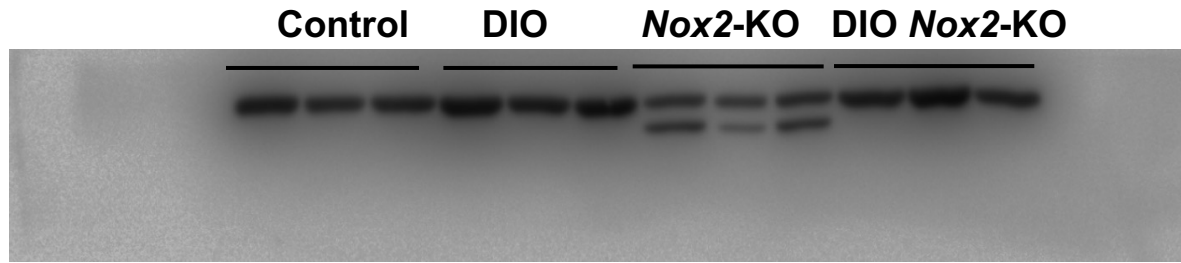

**Actin -2**

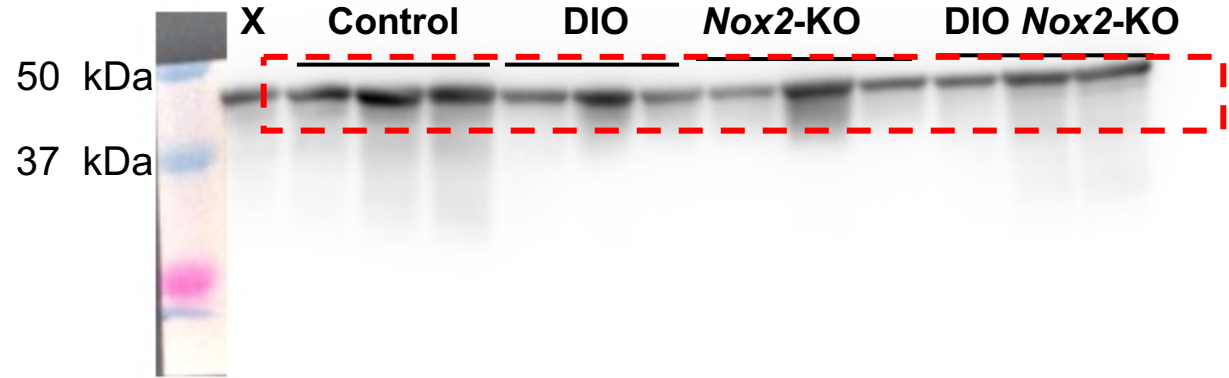

**Kv1.5-1**

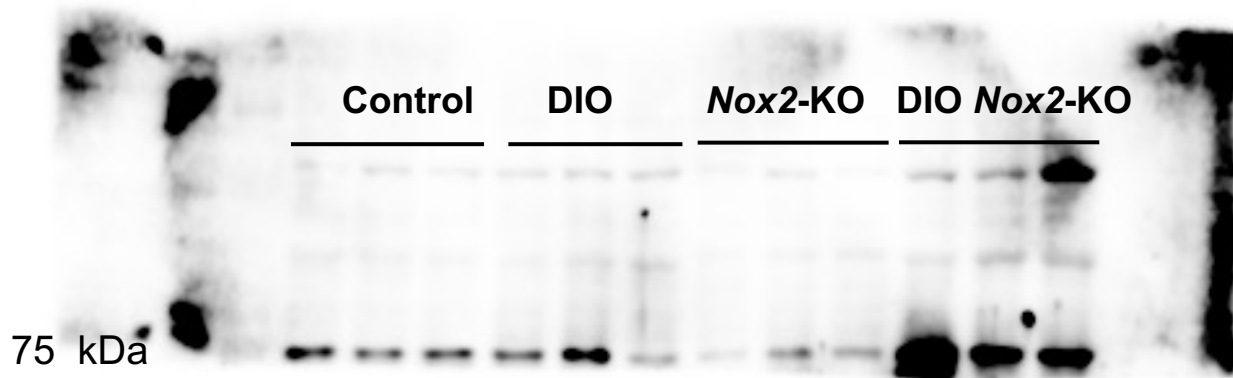

**Kv1.5-2**

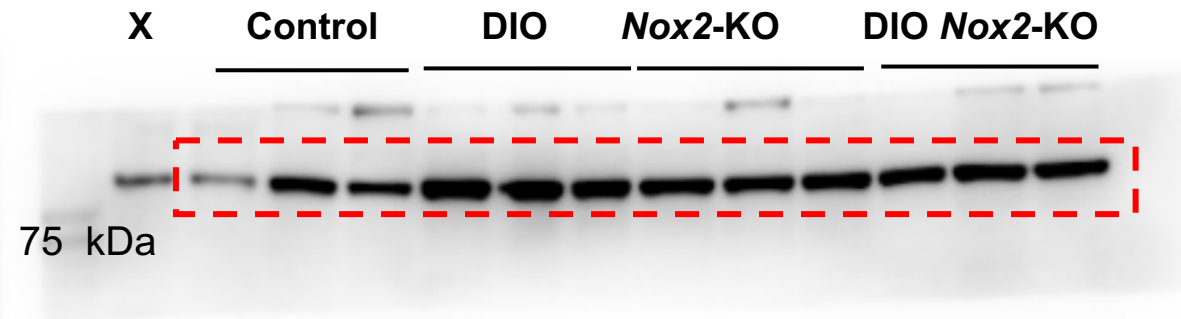

Red box refers to blot used in figure



# Unedited Figure S4F- Kir3.1 blot

## Blot 1- Actin

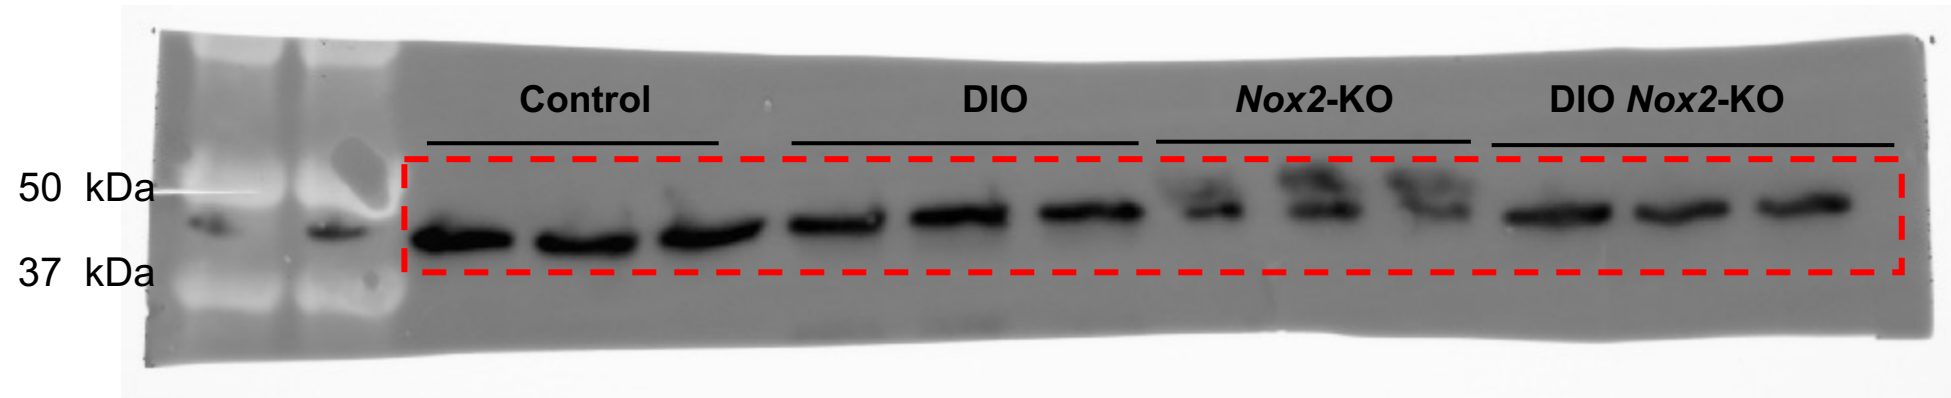

## Blot 1- Kir3.1

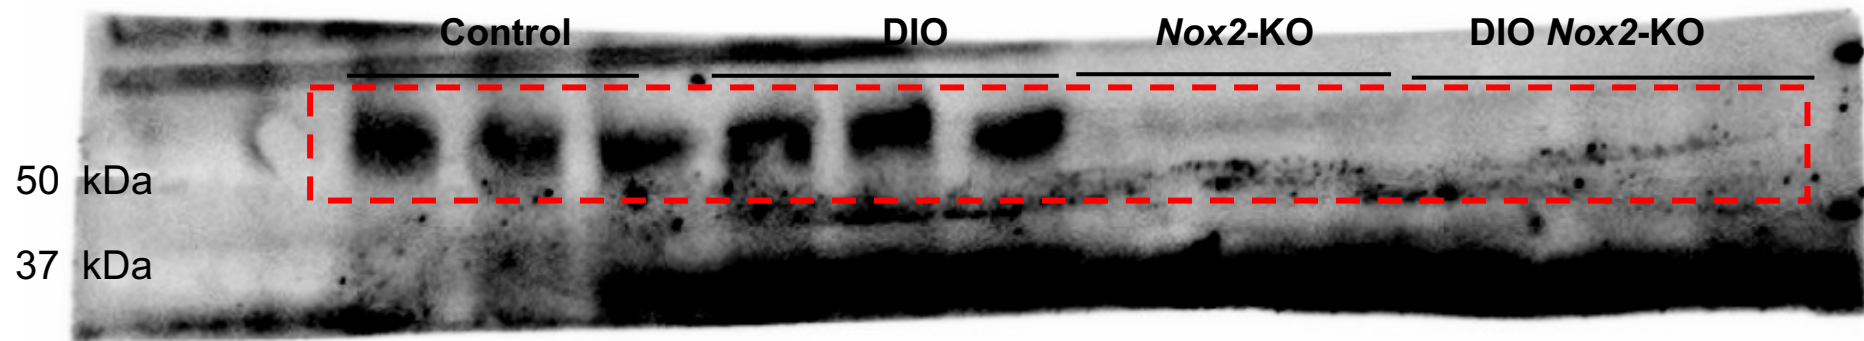

Red box refers to blot used in figure

# Unedited Figure S4G- Anp blots

## Actin -1

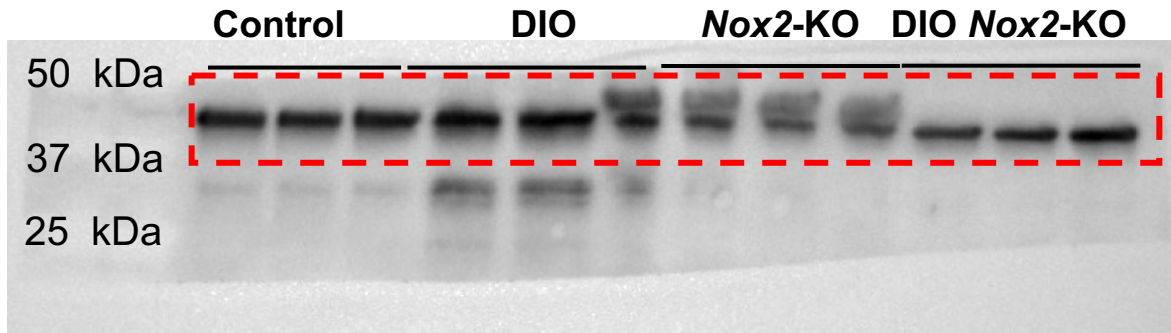

## Actin -2

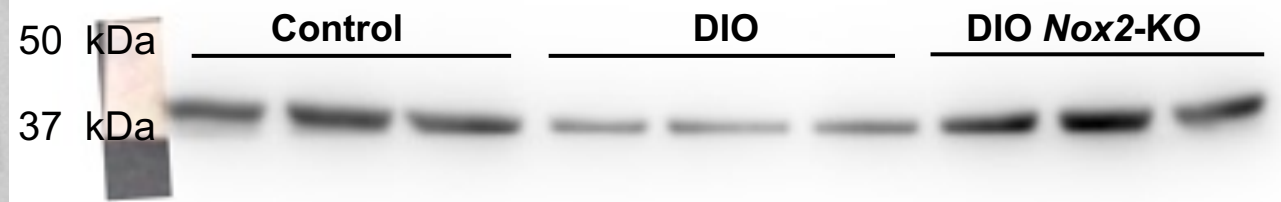

## Anp-1

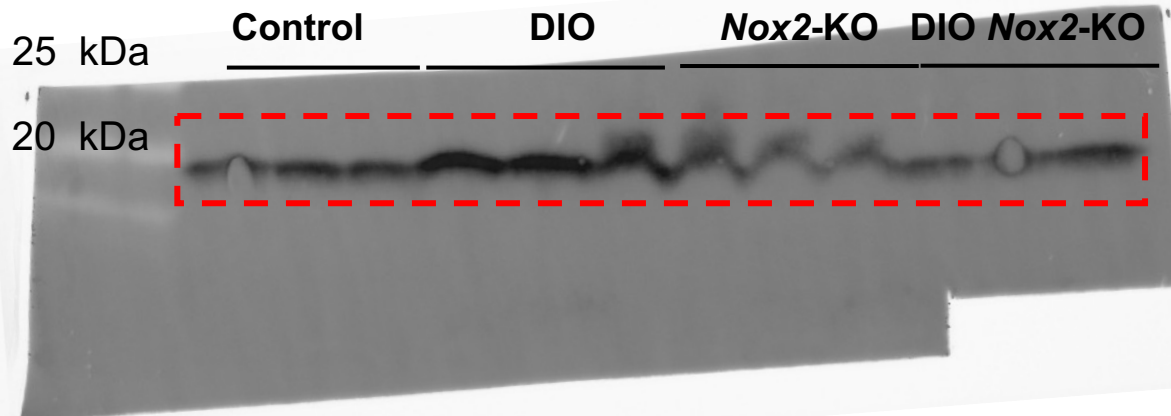

## Anp-2

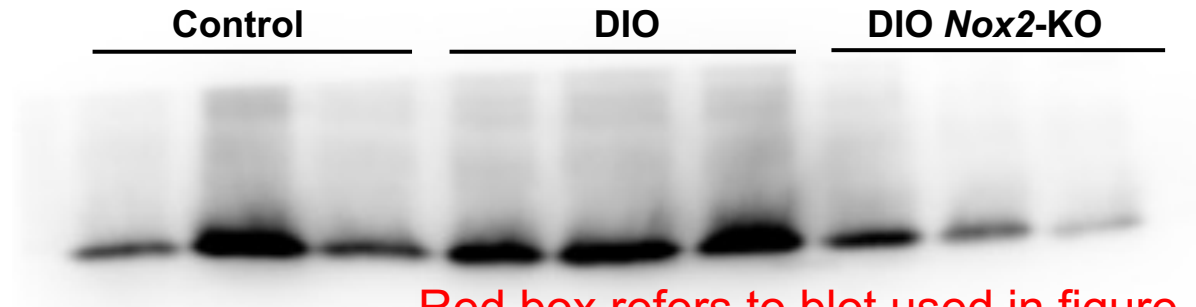

Red box refers to blot used in figure

# Unedited Figure S9A- cTnI blots

**Actin -1**

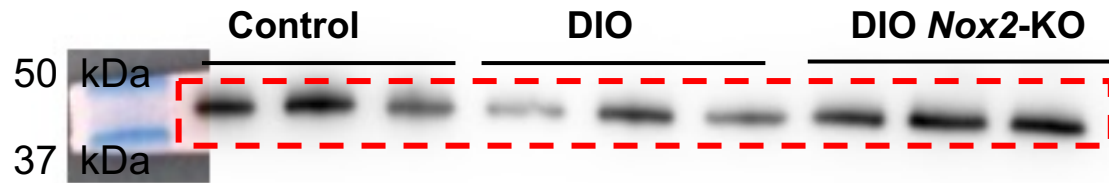

**Actin -2**

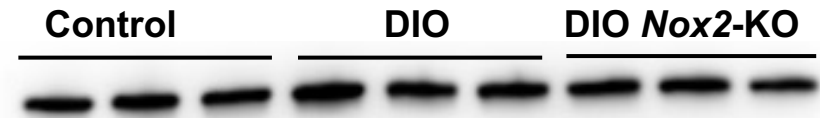

**cTnI-1**

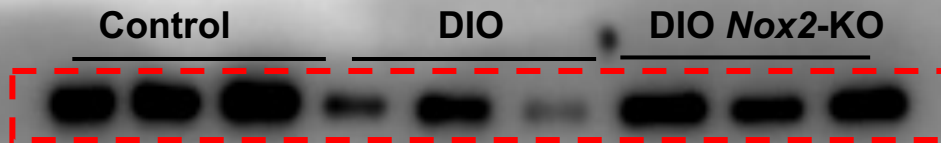

**cTnI- 2**

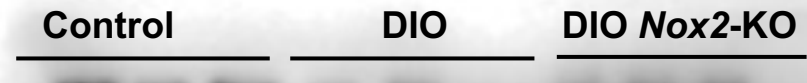

Red box refers to blot used in figure

# Unedited Figure S9B- cTnT blots

**Actin -1**

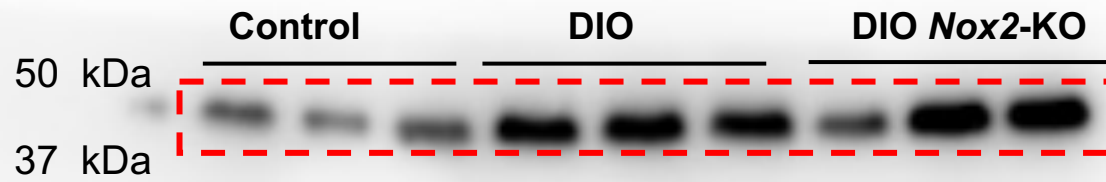

**Actin -2**

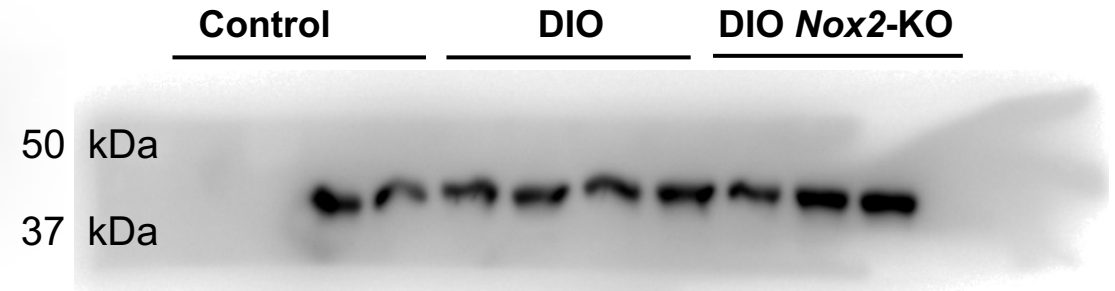

**cTnT-1**

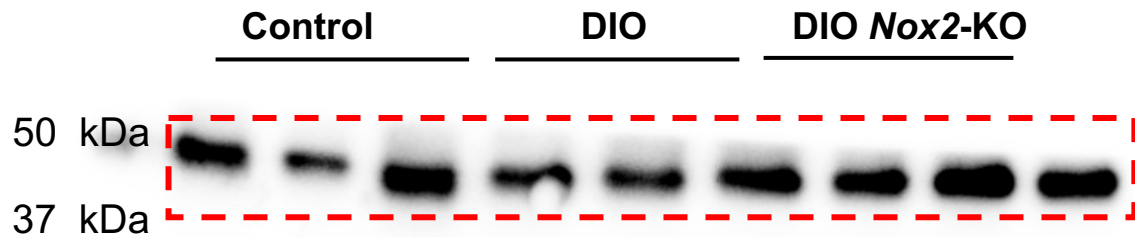

**cTnT- 2**

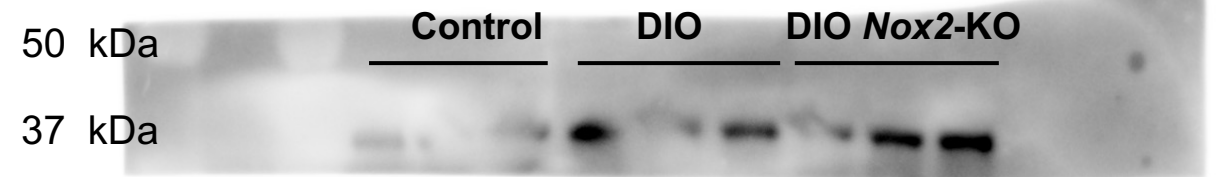

Red box refers to blot used in figure

# Unedited Figure S9C- Mybpc3 blots

## Actin -1

Control                      DIO                      DIO Nox2-KO

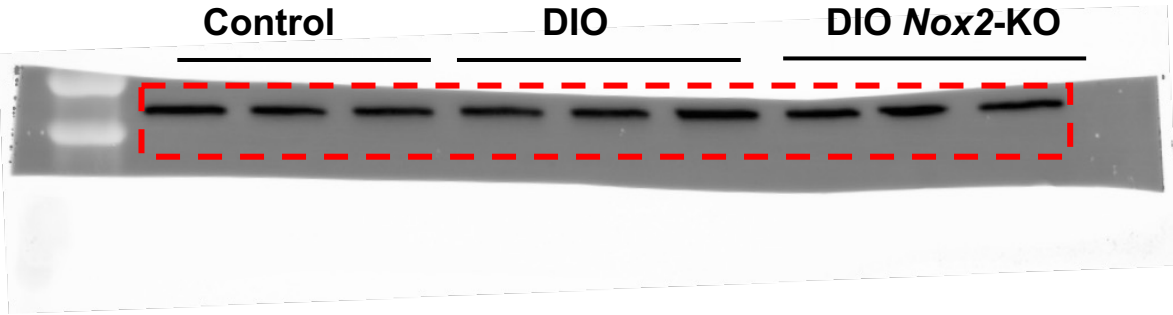

## Actin -2

Control                      DIO                      DIO Nox2-KO

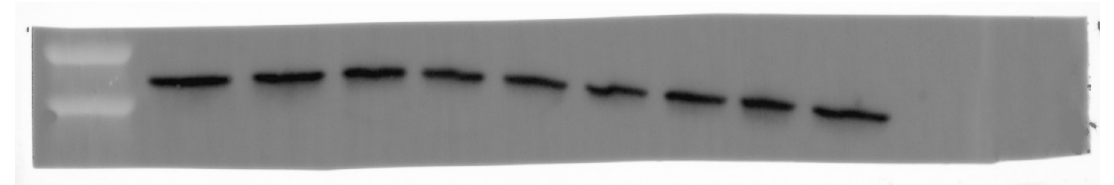

## Mybpc3-1

Control                      DIO                      DIO Nox2-KO

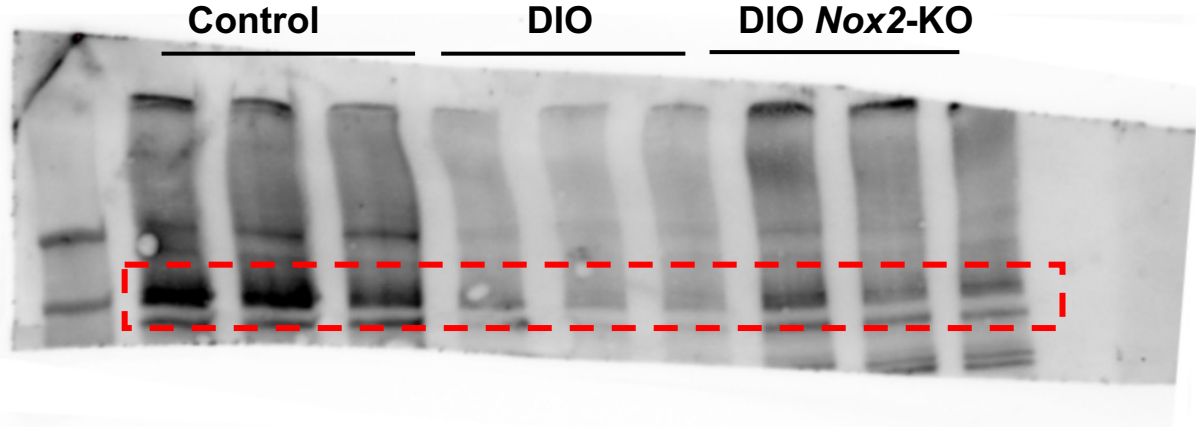

## Mymo1- 1

Control                      DIO                      DIO Nox2-KO

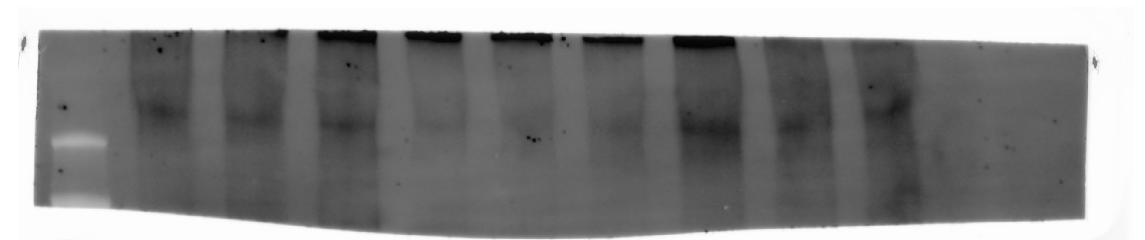

Red box refers to blot used in figure

# Unedited Figure S9D- Myom1 blots

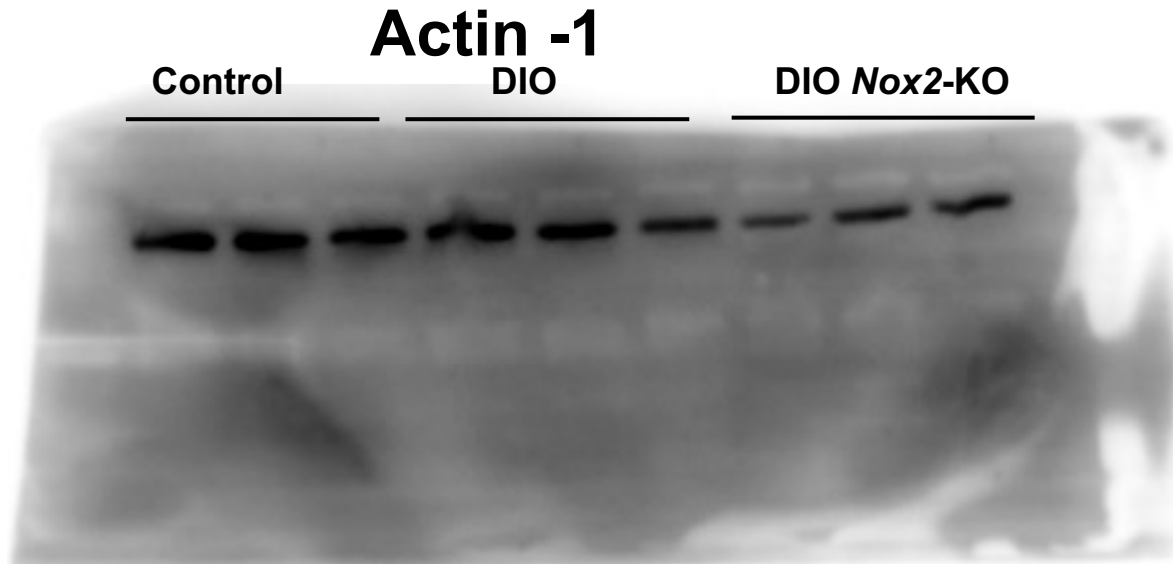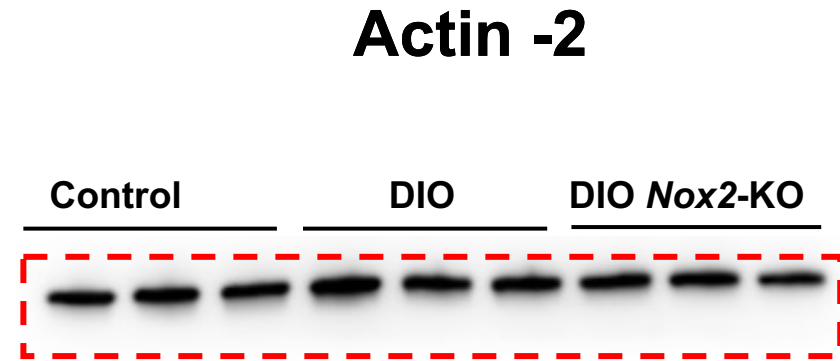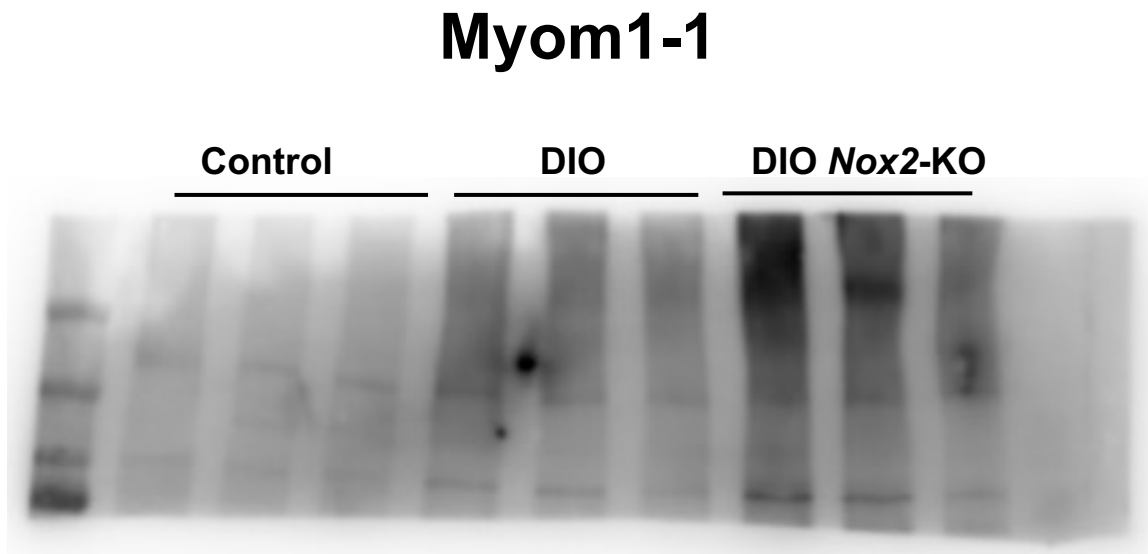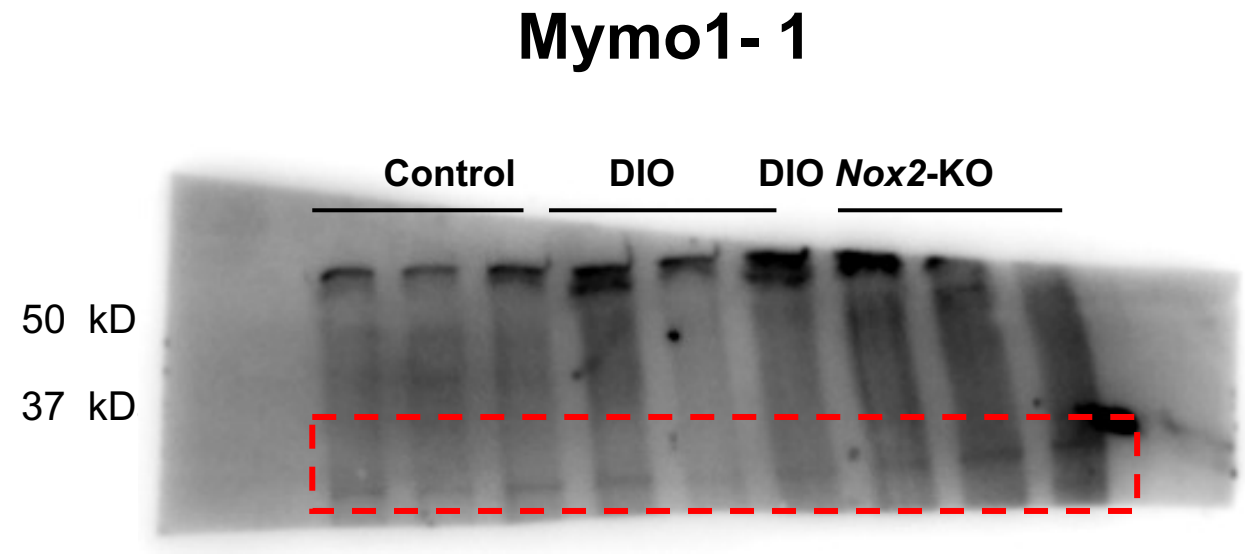

Red box refers to blot used in figure

# Unedited Figure S9E- Myl7 blots

## Actin -1

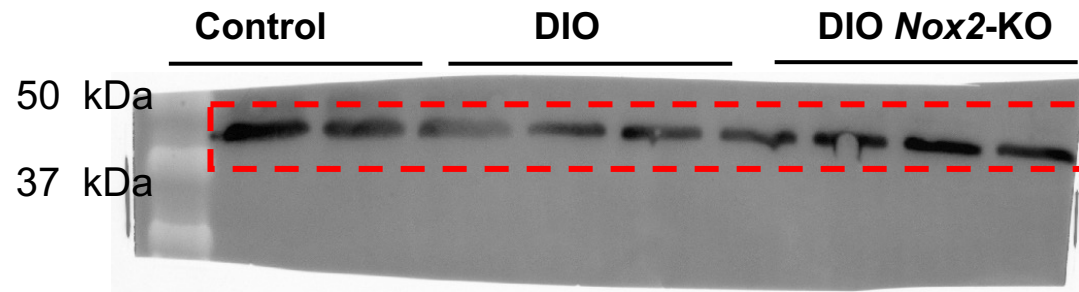

## Actin -2

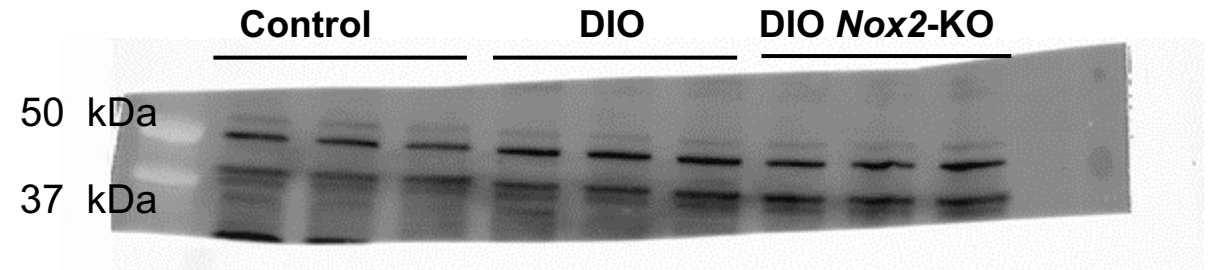

## Myl7-1

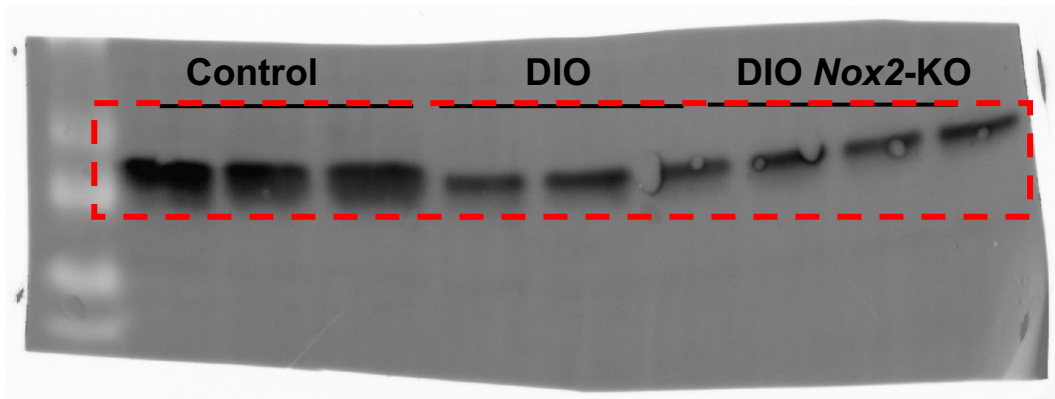

## Myl7- 2

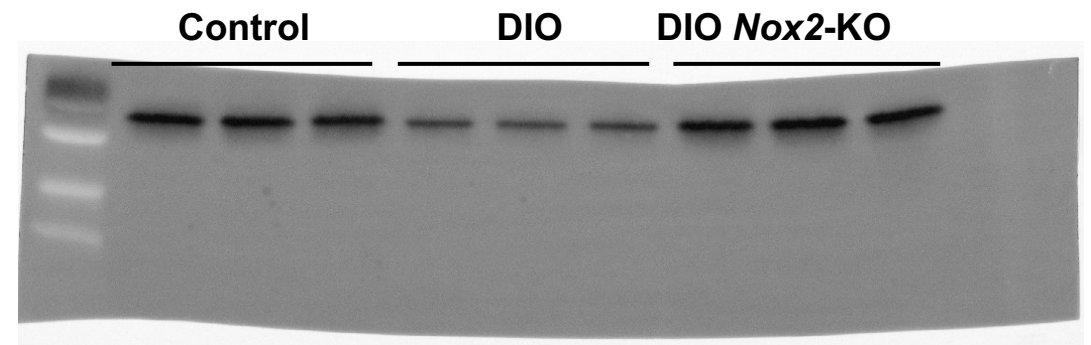

Red box refers to blot used in figure

# Unedited Figure S9F- Mlc2v blots

## Actin -1

## Actin -2

Control      DIO      DIO Nox2-KO

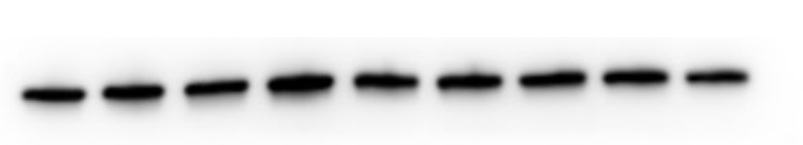

## Mlc2v- 2

Control      DIO      DIO Nox2-KO

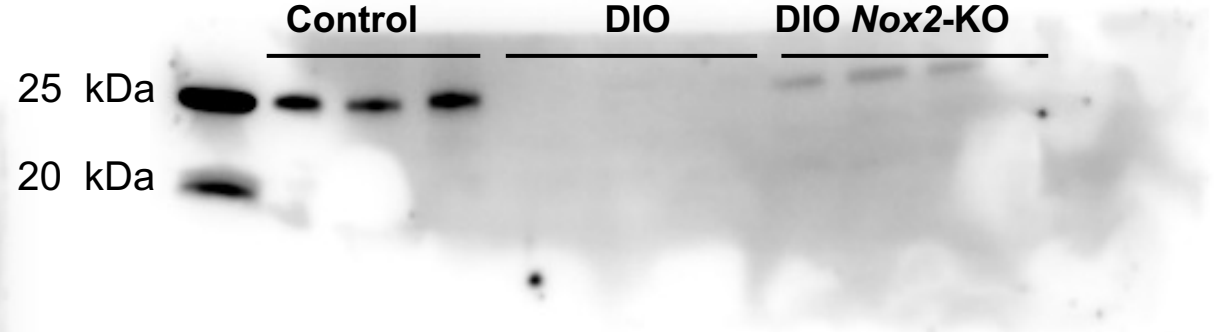

## Mlc2v-1

Control      DIO      DIO Nox2-KO

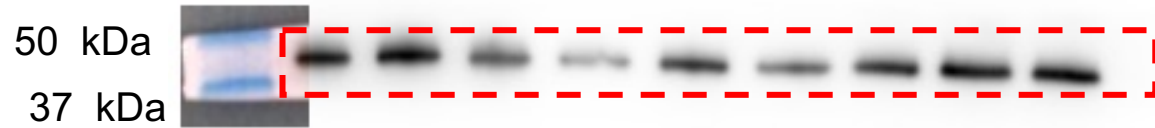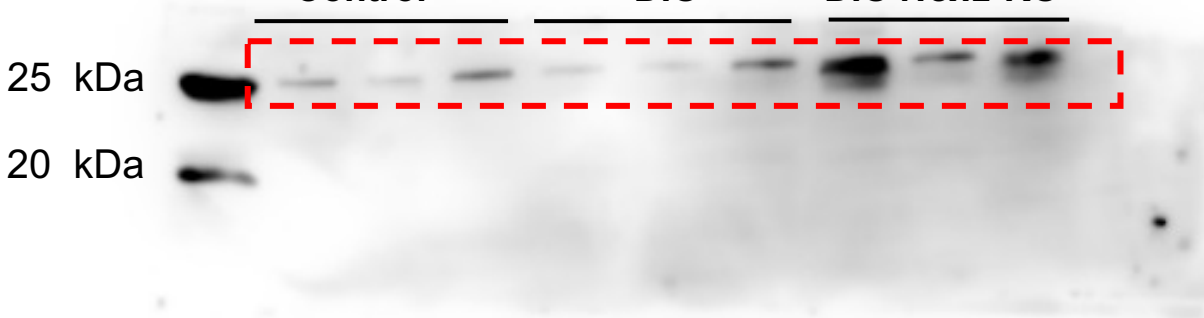

Red box refers to blot used in figure



# Unedited Figure S9G- Cpt1 $\alpha$ blots

Actin -1

Actin -2

Control

DIO

DIO Nox2-KO

Control

DIO

Nox2-KO

DIO Nox2-KO

Cpt1a-1

Cpt1a- 2

Control

DIO

DIO Nox2-KO

Control

DIO

Nox2-KO

DIO Nox2-KO

Red box refers to blot used in figure

# Unedited Figure S9H- Ppar $\alpha$ blots

**Actin -1**

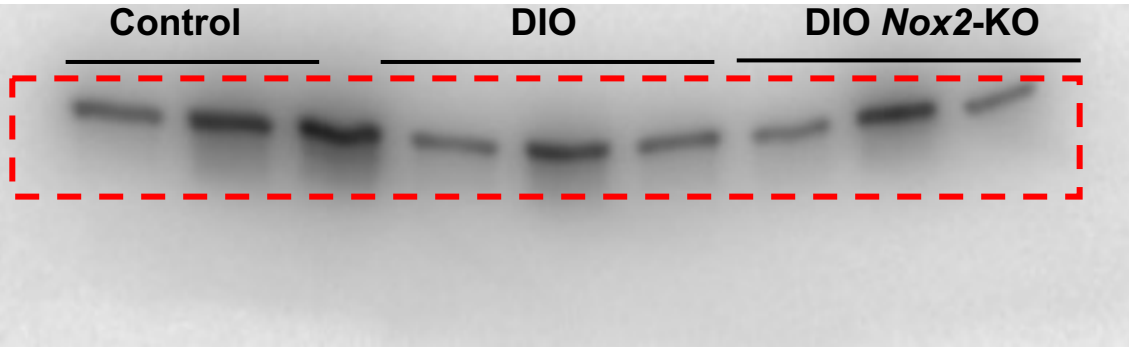

**Actin -2**

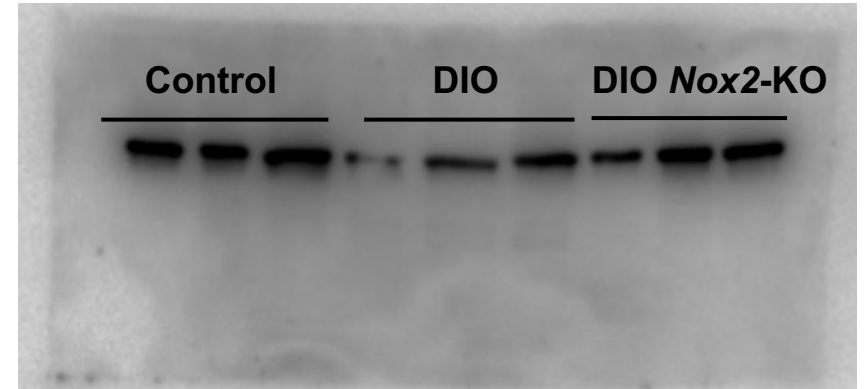

**Ppar $\alpha$ -1**

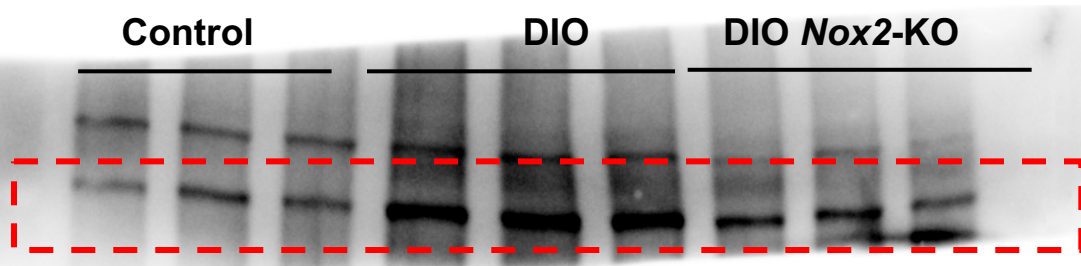

**Ppar $\alpha$ - 2**

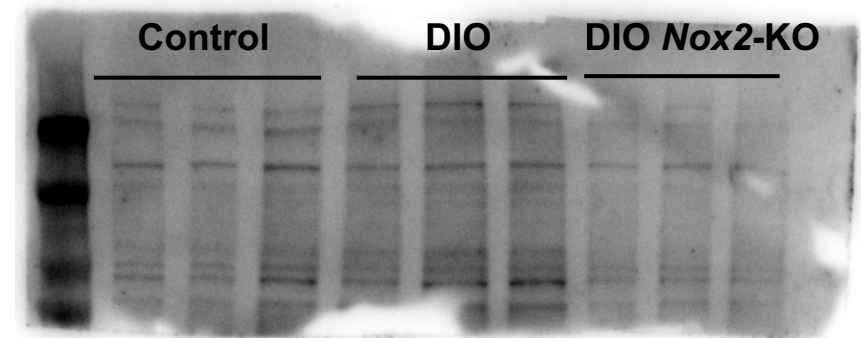

Red box refers to blot used in figure

# Unedited Figure S9I- Fabp3 blots

## Actin -1

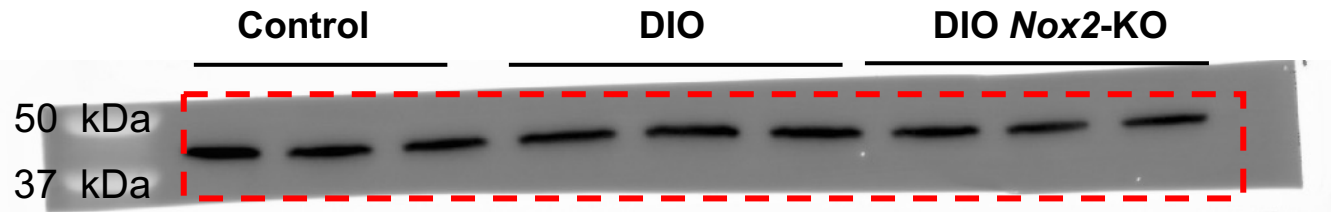

## Actin -2

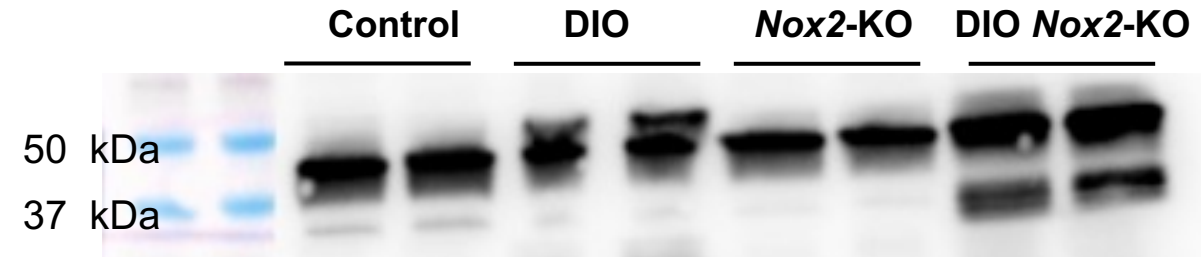

## Fabp3-1

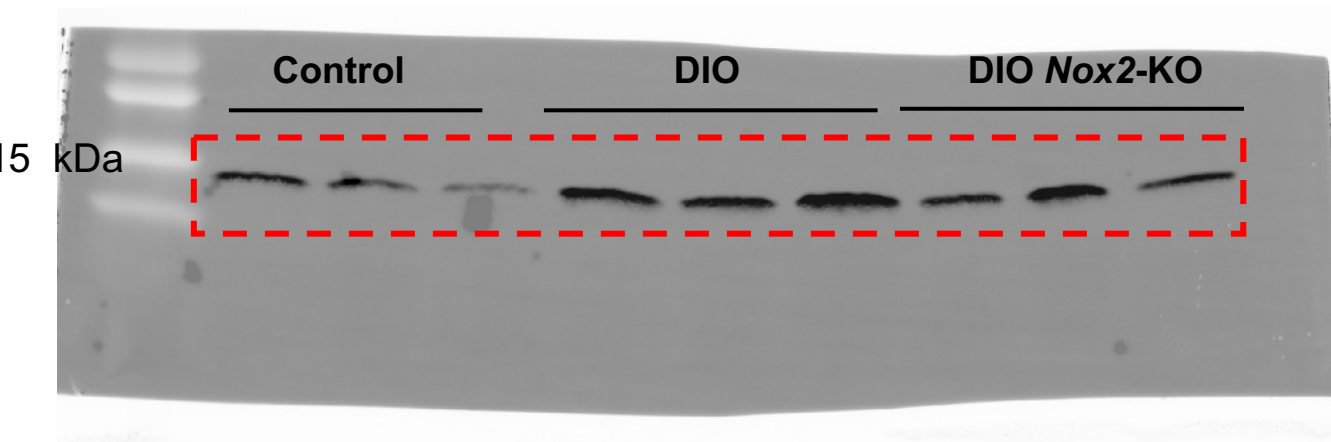

## Fabp3- 2

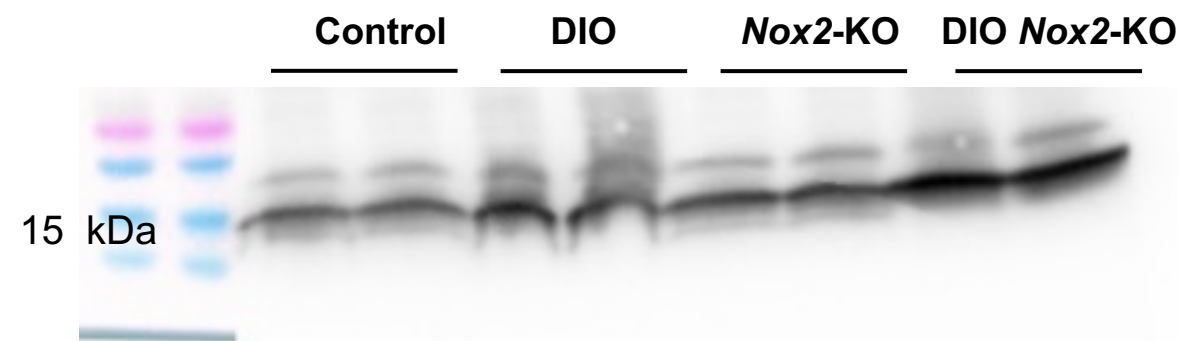

Red box refers to blot used in figure
