# Supplementary material for: Modulation of NOX2 causes obesity-mediated atrial fibrillation
Source: J Clin Invest. 2024 Aug 15;134(18):e175447. doi: 10.1172/JCI175447 (PMC11405042; doi:10.1172/JCI175447)
Supplement: Supplemental data [file jci-134-175447-s126.pdf]

**Table S1. Clinical characteristics of patients undergoing cardiac surgery from whom atrial tissue was obtained.**

|                                         | <b>Lean Weight<br/>(n = 6)</b> | <b>Overweight<br/>(n = 6)</b> | <b>Obesity<br/>(n = 12)</b> |
|-----------------------------------------|--------------------------------|-------------------------------|-----------------------------|
| Age (years)                             | 53.67 ± 20.20                  | 65.67 ± 15.23                 | 54.33 ± 13.69               |
| Body Mass Index<br>(kg/m <sup>2</sup> ) | 22.43 ± 1.33                   | 27.22 ± 0.65*                 | 33.40 ± 3.93*†              |
| Ejection Fraction (%)                   | 60 ± 7.75                      | 55.33 ± 16.57                 | 51.02 ± 12.16               |
| Left Atrial Size (cm)                   | 3.56 ± 0.56                    | 3.73 ± 0.46                   | 4.28 ± 1.04                 |
| Gender: Male                            | 5 (83.3%)                      | 5 (80%)                       | 9 (70%)                     |
| Female                                  | 1 (16.7%)                      | 1 (20%)                       | 3 (30%)                     |
| Ethnicity/Race:                         |                                |                               |                             |
| African American                        | 2 (33.3%)                      | 1 (16.7%)                     | 6 (50%)                     |
| Asian                                   | 1 (16.7%)                      | 0 (0%)                        | 1 (8.3%)                    |
| Hispanic                                | 3 (50%)                        | 3 (50%)                       | 4 (33.3%)                   |
| White                                   | 0 (0%)                         | 2 (33.3%)                     | 1 (8.3%)                    |
| Cardiac Procedure:                      |                                |                               |                             |
| CABG                                    | 4 (66.7%)                      | 3 (60%)                       | 7 (58.3%)                   |
| Valve replacement                       | 2 (33.3%)                      | 2 (33.3%)                     | 4 (33.3%)                   |
| Other                                   | 0 (0%)                         | 1 (16.7%)                     | 1 (8.3%)                    |
| Diabetes Mellitus                       | 1 (16.7%)                      | 3 (60%)                       | 5 (50%)                     |
| Hypertension                            | 6 (100%)                       | 5 (83.3%)                     | 10 (100%)                   |
| Coronary Artery<br>Disease              | 4 (66.7%)                      | 4 (66.7%)                     | 8 (66.67%)                  |
| History of Myocardial<br>Infarction     | 1 (16.7%)                      | 0 (0%)                        | 3 (25%)                     |
| Congestive Heart<br>Failure             | 0 (0%)                         | 2 (33.3%)                     | 6 (50%)                     |
| Valvular Heart Disease                  | 2 (33.3%)                      | 3 (50%)                       | 6 (50%)                     |

|                                     |        |        |            |
|-------------------------------------|--------|--------|------------|
| Stroke or Transient Ischemic Attack | 0 (0%) | 0 (0%) | 2 (16.67%) |
|-------------------------------------|--------|--------|------------|

\*p-value <0.05 when compared to the “Lean Weight” group. \*† p value <0.05 when compared to the “Overweight” group

Table S2

|                                        | Control<br>(n=7) | DIO (n=5)  | Nox2-KO<br>(n=5) | DIO<br>Nox2-KO<br>(n=5) | <i>P</i> <sub>Control<br/>vs. DIO</sub> | <i>P</i> <sub>DIO vs. DIO Nox2- KO</sub> | <i>P</i> <sub>ANOVA</sub> | <i>F</i> |
|----------------------------------------|------------------|------------|------------------|-------------------------|-----------------------------------------|------------------------------------------|---------------------------|----------|
| <b>BW (g)</b>                          | 27.5 ± 2.9       | 44.8 ± 3.9 | 24.5 ± 0.9       | 40.9 ± 3.7              | <b>&lt;0.0001</b>                       | 0.15                                     | <b>&lt;0.0001</b>         | 43.1     |
| <b>EF</b>                              | 61.8 ± 7.1       | 59.4 ± 6.3 | 59.4 ± 6.3       | 60.3 ± 9.6              | 0.57                                    | 0.83                                     | 0.94                      | 0.12     |
| <b>FS (%)</b>                          | 31.9 ± 4.5       | 31.3 ± 4.3 | 30.9 ± 7.2       | 31.8 ± 2.3              | 0.56                                    | 0.82                                     | 0.97                      | 0.03     |
| <b>A'/E'</b>                           | 0.9 ± 0.2        | 1.1 ± 0.3  | 1.0 ± 0.1        | 1.1 ± 0.1               | 0.28                                    | 0.52                                     | 0.27                      | 1.44     |
| <b>MV E/A</b>                          | 1.3 ± 0.2        | 1.3 ± 0.2  | 1.4 ± 0.2        | 1.3 ± 0.1               | 0.6                                     | 0.72                                     | 0.94                      | 0.05     |
| <b>CO (mL/min)</b>                     | 20.3 ± 3.2       | 18.8 ± 4.0 | 17.4 ± 2.4       | 22.9 ± 3.9              | 0.94                                    | 0.5                                      | 0.24                      | 1.6      |
| <b>LVPWs<br/>(mm)</b>                  | 1.1 ± 0.19       | 1.1 ± 0.14 | 1.1 ± 0.14       | 0.9 ± 0.60              | 0.94                                    | 0.52                                     | 0.68                      | 0.4      |
| <b>LVPWd<br/>(mm)</b>                  | 0.7 ± 0.10       | 0.8 ± 0.1  | 0.7 ± 0.1        | 0.8 ± 0.1               | 0.16                                    | 0.83                                     | 0.28                      | 1.4      |
| <b>LA (mm)</b>                         | 1.7 ± 0.20       | 2.3 ± 0.20 | 1.7 ± 0.03       | 1.9 ± 0.30              | <b>0.0008</b>                           | <b>0.04</b>                              | 0.28                      | 1.4      |
| <b>RAs (mm<sup>2</sup>)</b>            | 2.9 ± 0.70       | 2.8 ± 0.60 | 2.70 ± 0.50      | 3.40 ±<br>0.50          | 0.75                                    | 0.15                                     | 0.68                      | 0.4      |
| <b>RA<sub>d</sub> (mm<sup>2</sup>)</b> | 1.6 ± .04        | 1.8 ± 0.2  | 1.7 ± 0.8        | 1.8 ± 0.2               | <b>0.03</b>                             | 0.78                                     | 0.28                      | 1.4      |
| <b>RVs (mm<sup>2</sup>)</b>            | 6.3 ± .4         | 8.0 ± 1.4  | 7.8 ± 0.9        | 8.1 ± 0.5               | 0.11                                    | 0.91                                     | 0.28                      | 1.4      |

BW, body weight; EF, ejection fraction; FS, fractional shortening; A'/E', pulse wave ratio between active atrial contraction to mitral valve passive ventricle filling; CO, cardiac output; LVPWs, left ventricular posterior wall in systole; LVPWd, left ventricular wall in diastole; LA, Left atrial size; RAs, Right atrial area in systole; RA<sub>d</sub>, Right atrial area in diastole; RVs, Right ventricular area in systole.

| Gene                  | Primer/Probe       |                                                                         | Method |
|-----------------------|--------------------|-------------------------------------------------------------------------|--------|
| <i>GAPDH-Human</i>    | Forward<br>Reverse | 5'-AGCCACATCGCTCAGACACC-3'<br>5'-GTACTCAGCGCCAGCATCG-3'                 | SYBR   |
| <i>SCN5A-Human</i>    | Forward<br>Reverse | 5'-GAAGAAGCTGGGCTCCAAGA-3'<br>5'-CATCGAAGGCCTGCTTGGTC-3'                | SYBR   |
| <i>GJA5-Human</i>     | Forward<br>Reverse | 5'-GAAGAAGCTGGGCTCCAAGA-3'<br>5'-CATCGAAGGCCTGCTTGGTC-3'                | SYBR   |
| <i>CACNA1C-Human</i>  | Forward<br>Reverse | 5'-CCAACCTCATCCTCTTCTTCA-3'<br>5'-ACATAGTCTGCATTGCCTAGGAT-3'            | SYBR   |
| <i>NOX2-Human</i>     | Forward<br>Reverse | 5'- CTCCTGCAACCCGAGAAAGAC -3'<br>5'- TGCTCGAAAACTTCCACAATGA<br>-3'      | SYBR   |
| <i>PITX2-Human</i>    | Forward<br>Reverse | 5'-AAGGCGAGGATGAGATCCAG-3'<br>5'-TTCTTTGTGGATGGTCGCCG-3'                | SYBR   |
| <i>TBX5-Human</i>     | Forward<br>Reverse | 5'-<br>CTGTGGCTAAAATTCCACGAAGT -3'<br>5'- GTGATCGTCGGCAGGTACAAT -<br>3' | SYBR   |
| <i>Human<br/>TBX3</i> | Forward<br>Reverse | 5'-TGTACATTCACCCGGACAGC-3'<br>5'-TTGGGAAGGCCAAAGTAAATCCA-<br>3'         | SYBR   |
| <i>Kcnq1-Mouse</i>    | Forward<br>Reverse | 5'- CGCGGTGGTCAAGAAAGTGT -3'<br>5'- GCACTGTAGATGGAGACCCG -<br>3'        | SYBR   |
| <i>Kcne1-mouse</i>    | Forward<br>Reverse | 5'- TCGTCCCTGACCCTTTTCGT -3'<br>5'- GATAAGCGTCGTTACCCTTGG -<br>3'       | SYBR   |
| <i>Kcnj3-mouse</i>    | Forward<br>Reverse | 5'-<br>GGGGACGATTACCAGGTAGTG<br>-3'<br>5'- CGCTGCCGTTTCTTCTTGG -3'      | SYBR   |
| <i>Kcna5-mouse</i>    | Forward<br>Reverse | 5'- TCCGACGGCTGGACTCAATAA -<br>3'<br>5'- CAGCTCCTGAGGCATAGGG -3'        | SYBR   |
| <i>Anp-mouse</i>      | Forward<br>Reverse | 5'-<br>ACCTCCCGAAGCTACCTAAGT<br>-3'<br>5'- CAACCTTTTCAACGGCTCCAA -3'    | SYBR   |
| <i>Gapdh-mouse</i>    | Forward<br>Reverse | 5'- AATGGATTTGGACGCATTGGT -<br>3'<br>5'-                                | SYBR   |

|  |                              |  |
|--|------------------------------|--|
|  | TTTGCACTGGTACGTGTTGAT<br>-3' |  |
|--|------------------------------|--|

**Table S3: Primers used for RT-PCR to determine relative expression levels in iPSC-aCMs and human atrial tissue. HAT**

| <b>Antibody</b>                        | <b>Antibody vendor</b>                  | <b>Dilution</b> | <b>Experiment</b> |
|----------------------------------------|-----------------------------------------|-----------------|-------------------|
| anti-cTnT polyclonal (rabbit)          | proteintech (15513-1-AP)                | 1:500           | Western Blot      |
| anti-cTnI polyclonal (rabbit)          | abcam (ab47003)                         | 1:200           | Western Blot      |
| anti-Kv1.5 polyclonal (rabbit)         | Alomone (APC-150)                       | 1:200           | Western Blot      |
| anti-Nav1.5 polyclonal (rabbit)        | Alomone (ASC-005)                       | 1:200           | Western Blot      |
| anti-Kv7.1 polyclonal (rabbit)         | alomone (APC-022)                       | 1:200           | Western Blot      |
| anti-Nox4 polyclonal (rabbit)          | Proteintech (14347-1-AP)                | 1:1000          | Western Blot      |
| anti-KCNQ1 polyclonal (rabbit)         | alomone (APC-022)                       | 1:500           | Western Blot      |
| Anti- PKA C- $\alpha$ (rabbit)         | Cell Signaling Technology (4872)        | 1:1000          | Western Blot      |
| anti-mouse HRP                         | Cell Signaling Technology (7076)        | 1:1500          | Western Blot      |
| anti-Myom1 polyclonal (rabbit)         | proteintech (22084-1-AP)                | 1:500           | Western Blot      |
| anti-Mybpc3 monoclonal (rabbit)        | proteintech (67608-1-Ig)                | 1:500           | Western Blot      |
| anti-Myl7 polyclonal (rabbit)          | abcam (ab127001)                        | 1:500           | Western Blot      |
| Anti-PKC- $\delta$ polyclonal (rabbit) | abcam (ab182126)                        | 1:1000          | Western Blot      |
| Anti-PKC- $\alpha$ polyclonal (rabbit) | abcam (ab4124)                          | 1:1000          | Western Blot      |
| Anti-Fabp3 polyclonal (rabbit)         | Proteintech (10676-1-AP)                | 1:1000          | Western Blot      |
| Anti-Cpt1 $\alpha$ polyclonal (rabbit) | abcam (ab128568)                        | 1:1000          | Western Blot      |
| Anti-PPA $\alpha$ monoclonal (mouse)   | Santa Cruz Biotechnology (sc-398394)    | 1:1000          | Western Blot      |
| anti-Mlc2v polyclonal (rabbit)         | abcam (ab92721)                         | 1:500           | Western Blot      |
| anti-rabbit HRP                        | Cell Signaling Technology (7076)        | 1:1500          | Western Blot      |
| anti-Actin HRP                         | Santa Cruz Biotechnology (sc-47778 HRP) | 1:2500          | Western Blot      |
| Anti-Pitx2 monoclonal (mouse)          | Santa Cruz Biotechnology (sc-390457)    | 1:1000          | Western Blot      |
| Anti-Kir3.1 polyclonal (mouse)         | Santa Cruz Biotechnology (sc-50410)     | 1:500           | Western Blot      |

**Table S4: Antibodies used in western blots and immunofluorescence to probe protein expression levels and localization.**

**Supplementary Figure S1**

A

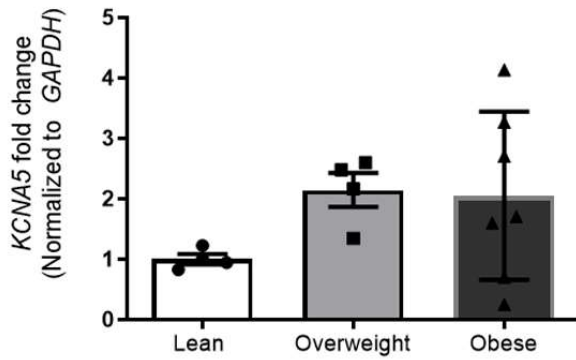

B

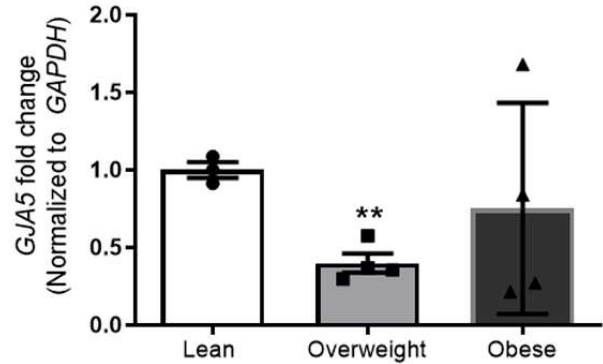

C

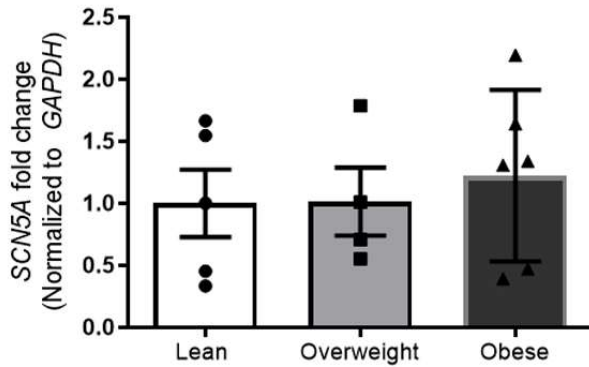

D

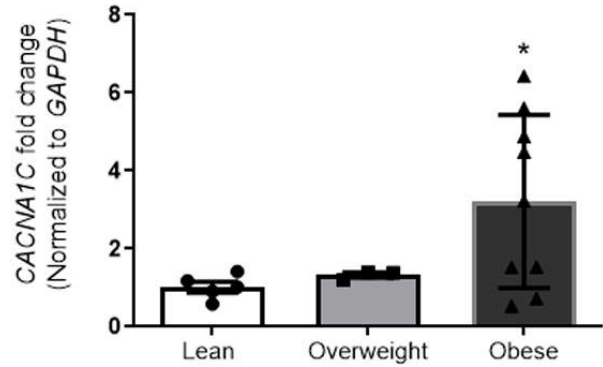

E

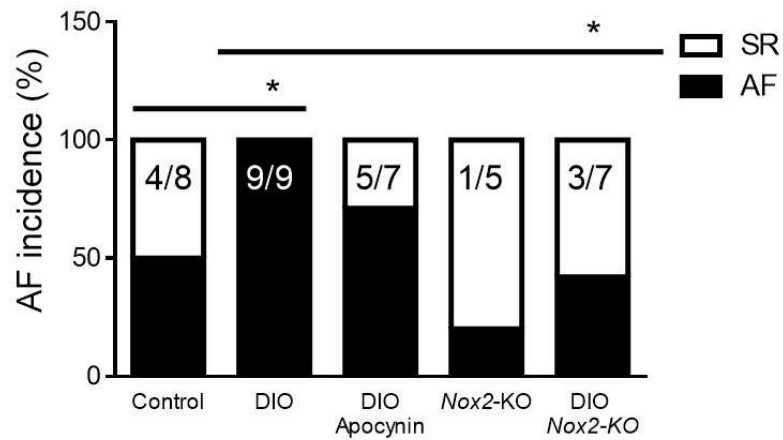

**Figure S1. Expression of ion channel and structural genes in atrial tissues from lean, overweight, and obese individuals. (A)** qPCR data showing the transcriptional level of Human Potassium Voltage-Gated Channel Subfamily A Member 5 (*KCNA5*), encoding for  $I_{Kur}$  current from

lean (n=4), overweight (n=4), and obese individuals (n=7). **(B)** Human gap junction alpha protein encoding for atrial specific connexin 40 (*GJA5*) current from lean (n=3), overweight (n=4), and obese individuals (n=4). **(C)** Human cardiac sodium channel type V  $\alpha$ -subunit (*SCN5A*) lean (n=5), overweight (n=4), and obese individuals (n=6) **(D)** Calcium Voltage-Gated Channel Subunit Alpha1 C (*CACNA1C*), encoding for the L -type calcium current protein lean (n=6), overweight (n=3), and obese individuals (n=9). **(E)** Incidence of AF (%) in Control (N=8), DIO (N=9), DIO-Apocynin (N=7), *Nox2*-KO (N=5), and DIO *Nox2*-KO (N=7) mice.  $P>0.05$ ;  $*P<0.05$ ;  $**P<0.01$ ;  $***P<0.001$ ;  $****P<0.0001$ , by 2-tailed, unpaired Student's *t* test.

## Supplementary Figure S2

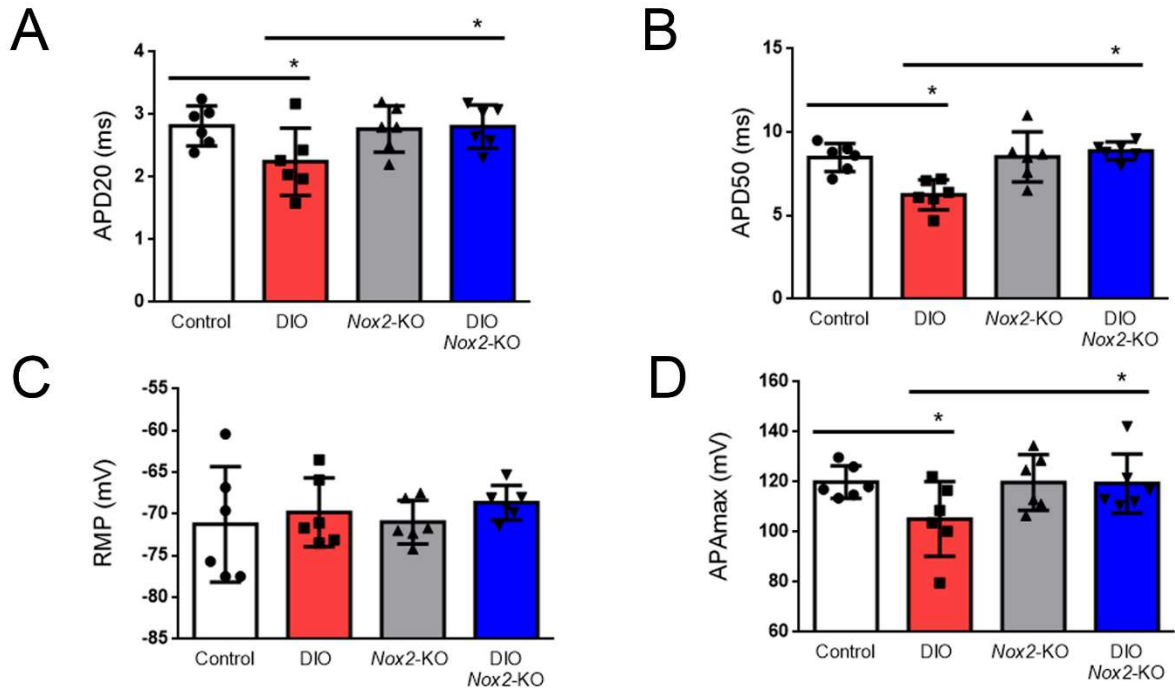

**Figure S2. Measured AP parameters in control (n=6 cells, N= 4 mice), DIO (n=6 cells, N= 4 mice), Nox2-KO (n=6 cells, N= 3 mice), and DIO-Nox2-KO mice (n=6 cells, N= 3 mice). (A)** Action potential duration (APD) at 20% repolarization (APD20). **(B)** APD at 50% repolarization (APD50). **(C)** Resting membrane potential (RMP). **(D)** Maximum action potential amplitude (APA<sub>max</sub>). P>0.05; \*P<0.05; \*\*P<0.01; \*\*\*P<0.001; \*\*\*\*P<0.0001, by 2-tailed, unpaired Student's *t* test.

# Supplementary Figure S3

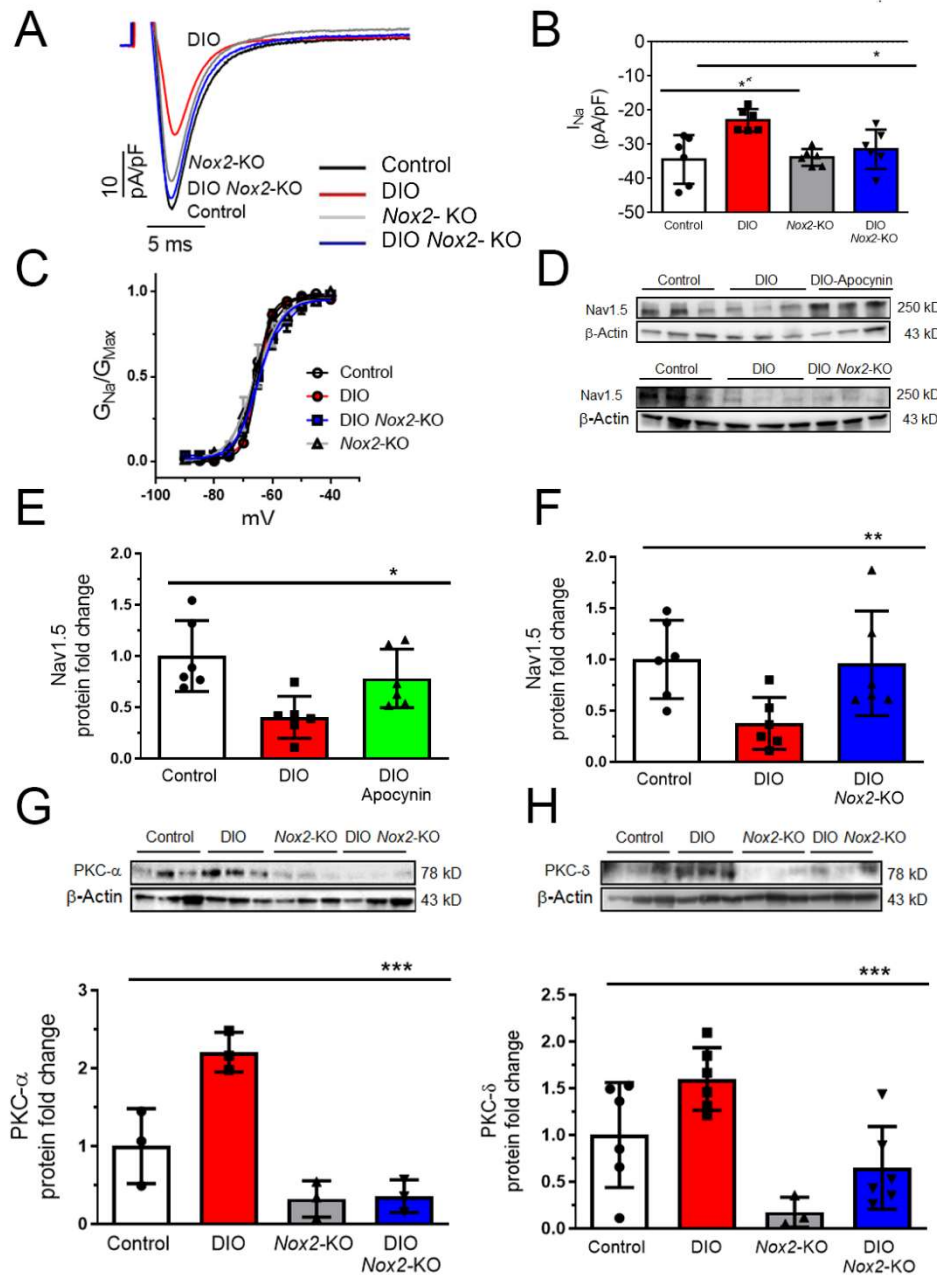

Figure S3. Normalized  $I_{Na}$  in DIO *Nox2*-KO compared to DIO mice. (A) Representative  $I_{Na}$  tracings from all 4 groups of mice showing increased  $I_{Na}$  in DIO *Nox2*-KO mice versus DIO mice. (B) Peak sodium ( $I_{Na}$ ) current density in control, DIO, *Nox2*-KO, and DIO *Nox2*-KO mice

(n=6 cells, N= 3 mice each). (C) Activation curve of  $I_{Na}$  current in the 4 groups of mice. (D) Western blot showing cardiac sodium channel type 5 alpha subunit ( $Na_v1.5$ ) expression in atria of control, DIO, DIO-Apocynin, and *Nox2*-KO DIO mice (N=6 each). (E-F) Quantification of  $Na_v1.5$  expression among the 4 groups (N=6 each). (G) Western blot and quantification showing PKC- $\alpha$  expression in atria of control, DIO, *Nox2*-KO and *Nox2*-KO-DIO mice (N=3 each). (H) Western blot and quantification showing PKC- $\delta$  expression in atria of control, DIO, DIO-*Nox2*-KO mice (N=6 each), and *Nox2*-KO (N=3). One-way ANOVA was used to compute statistical significance in Panels E-H. \*P<0.05; \*\*P<0.01; \*\*\*P<0.001.

Supplementary Figure S4

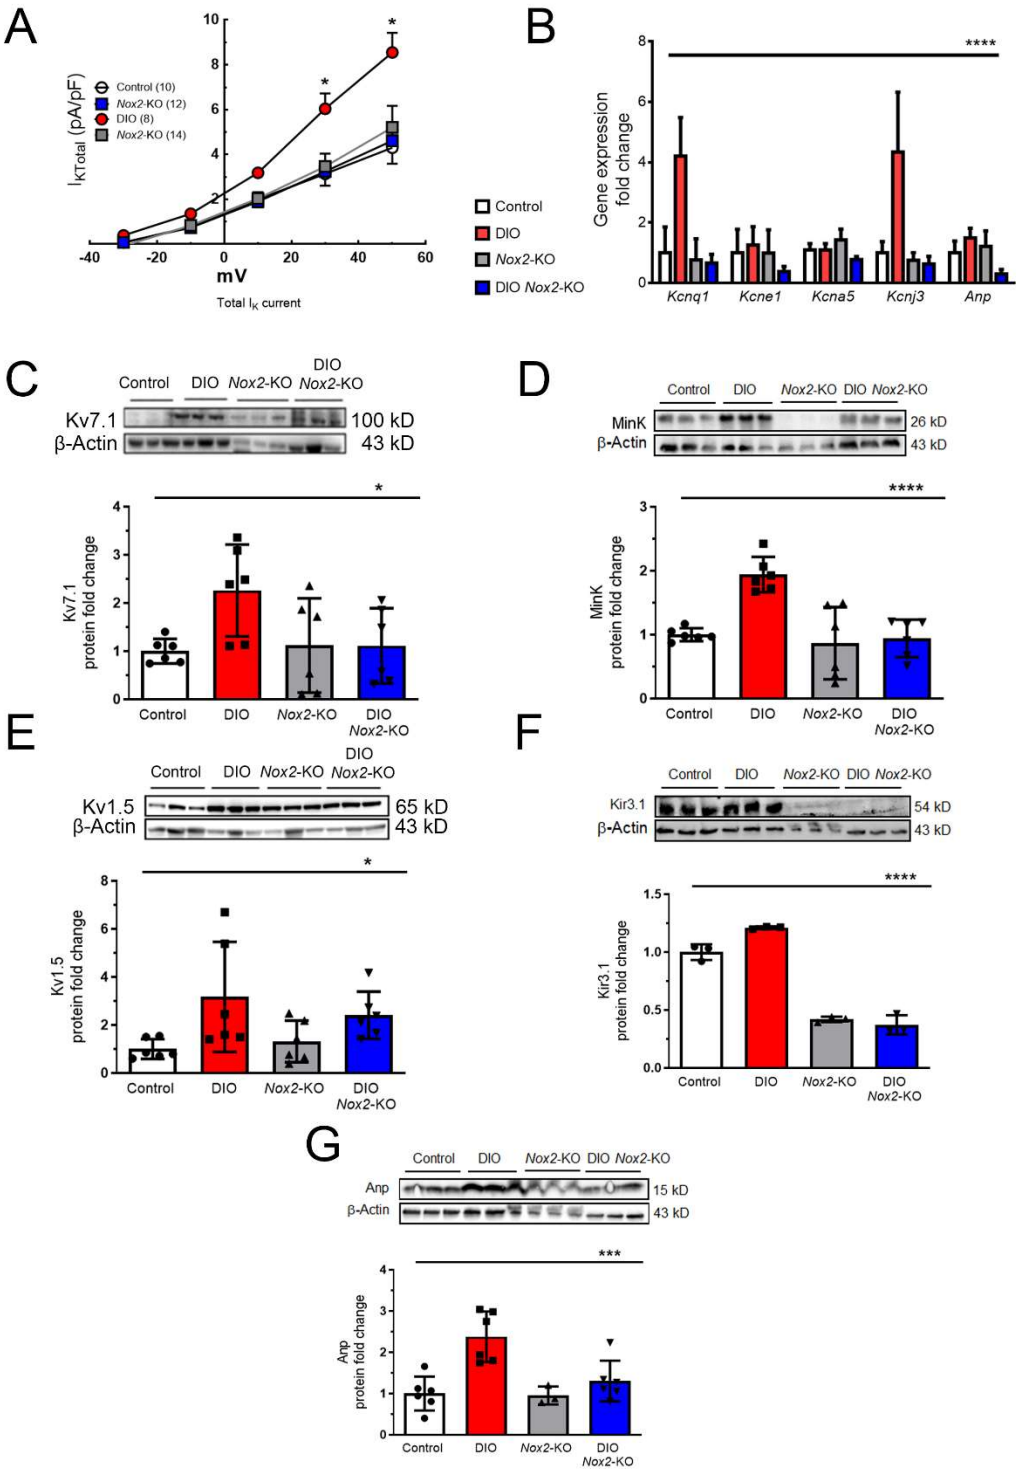

**Figure S4. Increased expression of K<sup>+</sup> channels in DIO-*Nox2*-KO compared to DIO mice.**

(A) Total potassium (K<sup>+</sup>) current ( $I_K$ ) current and voltage relationship (I–V curves) in control (N=10), DIO (N=8), *Nox2*-KO (14) and DIO *Nox2*-KO mice (N=12). (B) qPCR data on K<sup>+</sup> channel genes- *Kcnq1*, *Kcne1*, *Kcna5*, *Kcnj3* and *Anp* in the 4 mouse groups (N=3 each). (C) Western blot and quantification of showing  $I_{Ks}$  encoding Kv7.1 in control, DIO, *Nox2*-KO, and DIO *Nox2*-KO mice (N=6 each). (D) Western blot and quantification of showing  $I_{Ks}$  encoding minK in the 4 mouse groups (N=6 each). (E) Western blot and quantification of showing Kv1.5 encoding in the 4 mouse groups (N=6 each). (F) Western blot and quantification of showing Kir3.1 encoding *Kcnj3* in the 4 mouse groups (N=3 each). (G) Western blot and quantification of showing *Anp* in the Control, DIO, DIO *Nox2*-KO mouse groups (N=6 each) and *Nox2*-KO (N=3). Two-way ANOVA was used in qPCR analysis in Panel B. One-way ANOVA was used in western blot analyses in panels C-G. \*P<0.05; \*\*P<0.01; \*\*\*P<0.001; \*\*\*\*P<0.0001.

# Supplementary Figure S5

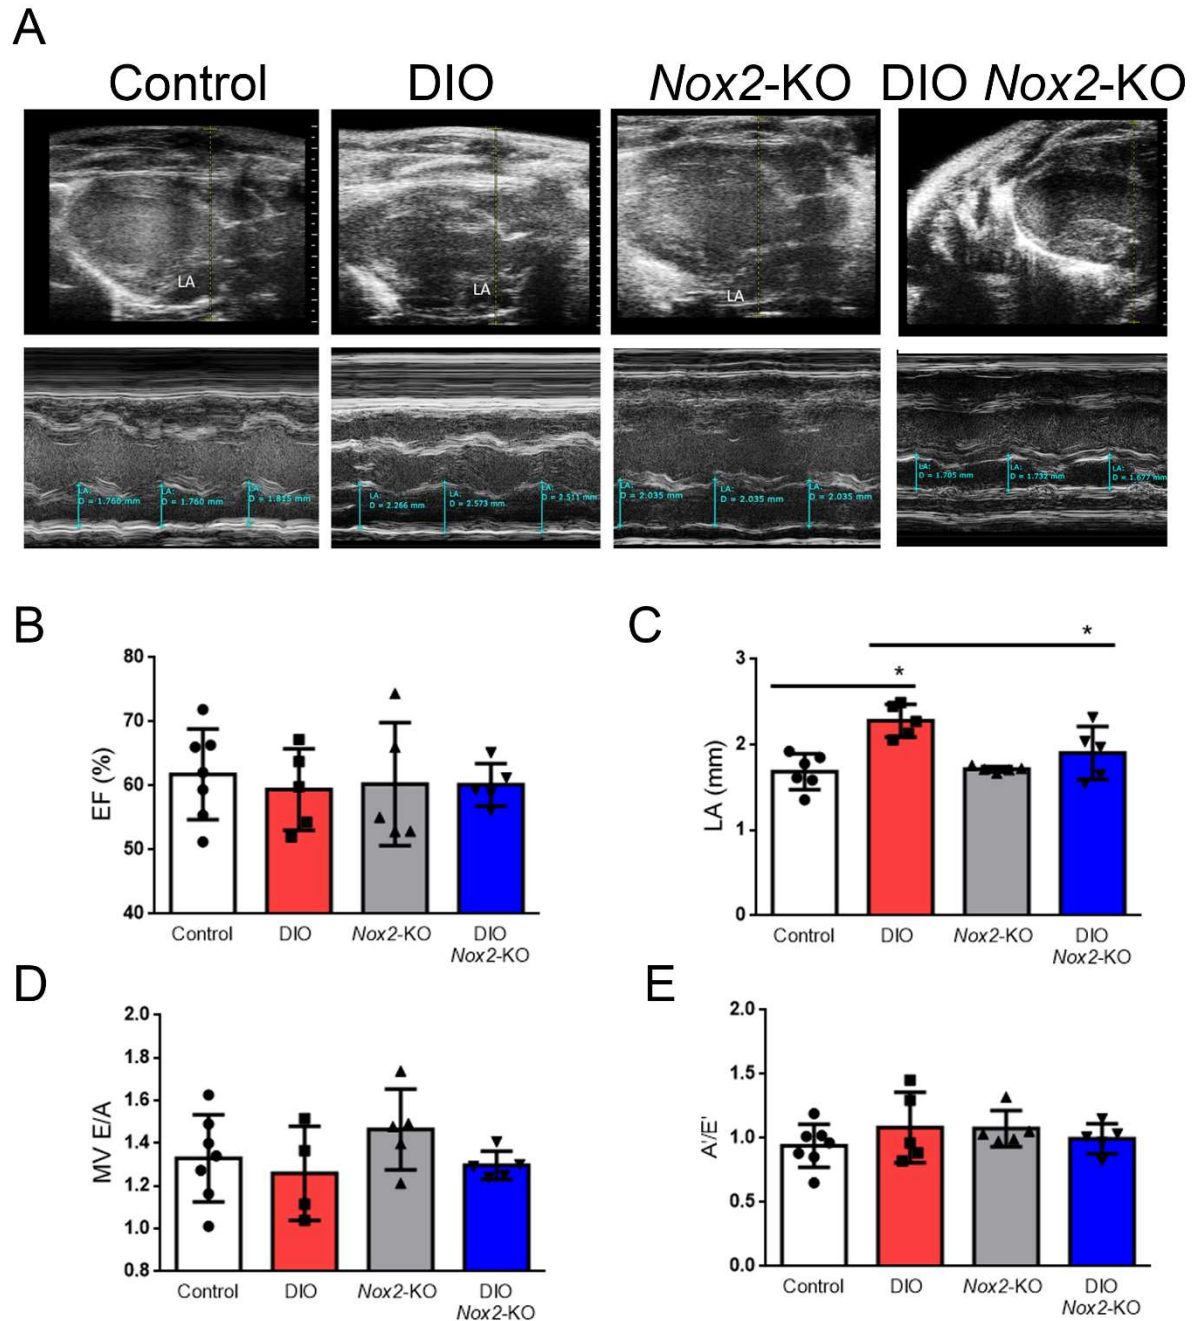

**Figure S5. Left atrial (LA) enlargement in DIO mice is reduced after *Nox2* inhibition.**

**(A)** Representative long axis (LAX) images of control (n=7), DIO (n=5), *Nox2*-KO (n=5) and DIO

*Nox2*-KO mice (n=5). **(B)** Quantified ejection fraction (EF) in the 4 groups of mice each. **(C)** LA diameter in control, DIO, and *Nox2*-KO DIO mice. **(D)** Quantified doppler ratio between mitral valve active atrial contraction to passive ventricle filling ( $E'/A'$ ). **(E)** Quantified doppler ratio between passive ventricle filling to atrial contraction. 1-way ANOVA test-  $P>0.05$ ;  $*P<0.05$ ;  $**P<0.01$

## Supplementary Figure S6

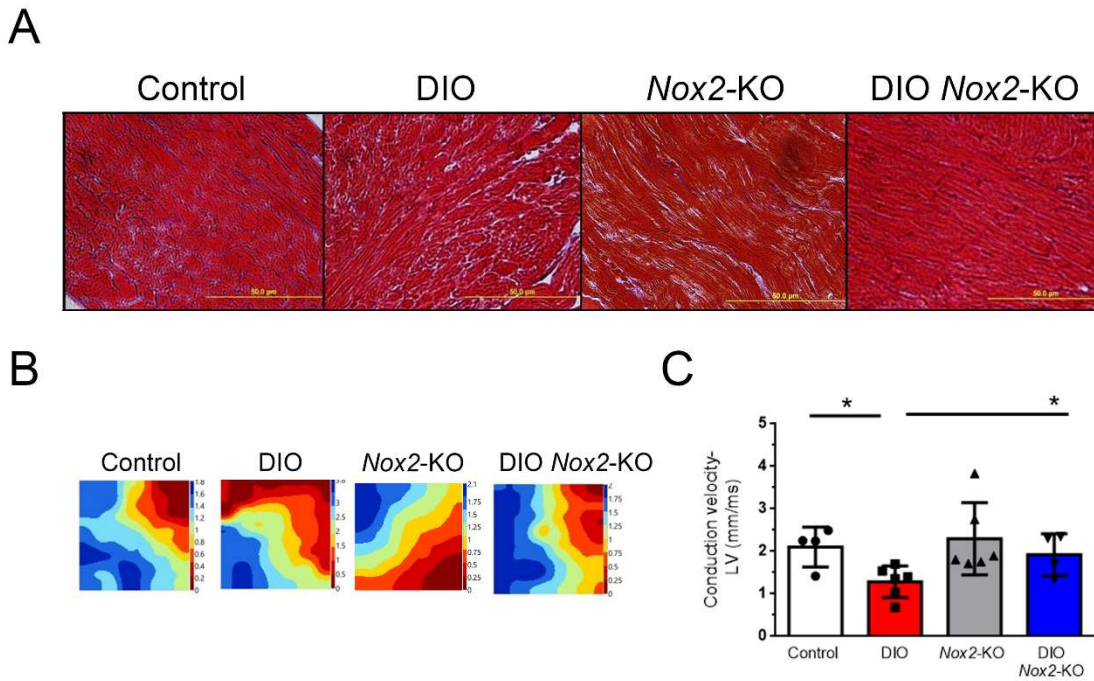

**Figure S6. Effect of Nox2 inhibition on left ventricular fibrosis and conduction velocity (CV) in DIO mice. (A)** Masson trichrome staining of ventricular myocytes from control, DIO, and DIO-Nox2-KO mice. **(B)** Representative isochronal maps of the left ventricle in using electrical mapping in control (N=4 mice), DIO (N=6 mice), Nox2-KO (N=6), and DIO Nox2-KO (N=4) and quantification of mean left ventricular CV \*P<0.05; \*\*P<0.01; \*\*\*\*P<0.0001, by 2-tailed, unpaired Student's *t* test.

**Supplementary Figure S7.**

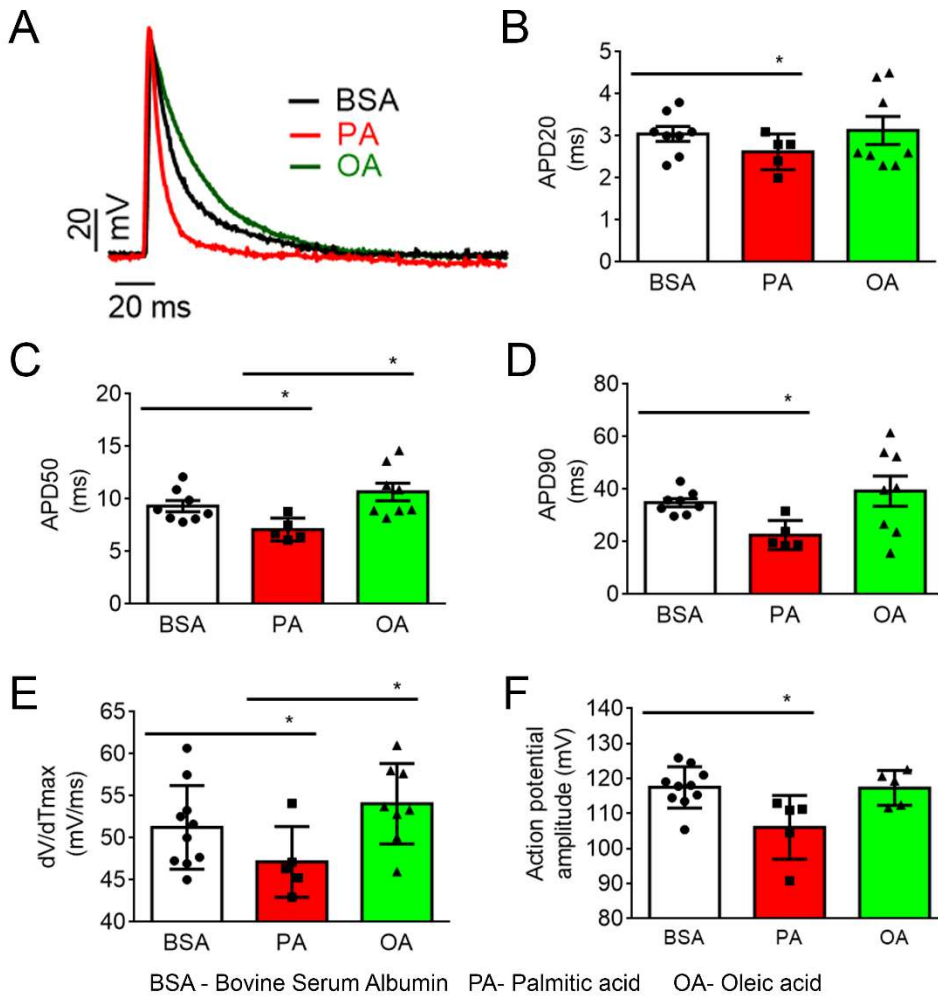

**Figure S7. Treatment of hiPSC-aCMs with palmitic acid (PA) shortens the atrial AP compared to bovine serum albumin (BSA) and oleic acid (OA) treated-hiPSC-aCMs: (A)** Whole-cell patch-clamping of BSA, PA, and OA treated-hiPSC-aCMs. **(B)** Measured APD at 20% repolarization (APD20) in BSA (n=8), PA (n=5), and OA treated-hiPSC-aCMs (n=5 cells). **(C)** Measured APD at 50% repolarization (APD50) in BSA (n=8), PA (n=5), and OA treated-hiPSC-aCMs (n=5 cells) **(D)** Measured APD at 90% repolarization (APD90) in BSA (n=8), PA (n=5), and OA treated-hiPSC-aCMs (n=5 cells) **(E)** Instantaneous rate of voltage change over time ( $dV/dT_{max}$ ), an indicator of atrial conduction velocity (CV) in BSA (n=10), PA (n=5), and OA

treated-hiPSC-aCMs (n=5 cells). **(F)** Maximum atrial potential amplitude (APA<sub>max</sub>) in BSA (n=10), PA (n=5), and OA treated-hiPSC-aCMs (n=5 cells).  $P>0.05$ ; \* $P<0.05$ ; \*\* $P<0.01$ ; \*\*\* $P<0.001$ ; \*\*\*\* $P<0.0001$ , by 2-tailed, unpaired Student's *t* test.

Supplementary Figure S8.

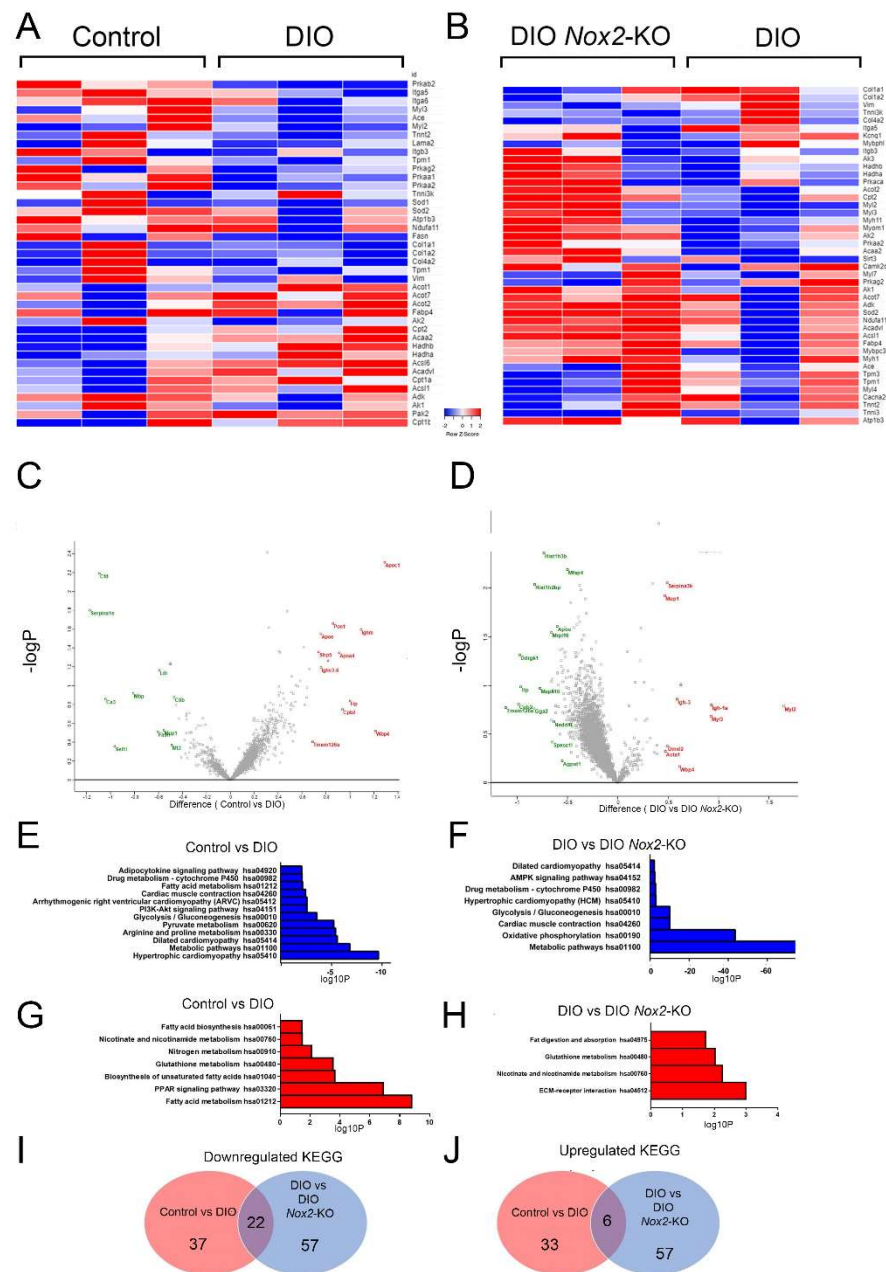

**Figure S8. Global quantitative proteomics and pathway enrichment analysis in the control, DIO, and DIO *Nox2*-KO atrial lysates. (A)** Heatmap of cardiac related upregulated and downregulated proteins in control (no HFD) versus DIO (N=3 mice each). **(B)** Heatmap of cardiac related upregulated and downregulated proteins in DIO versus DIO-*Nox2*-KO atrial lysates (N=3

each). **(C-D)** Volcano plots showing both significantly upregulated and downregulated proteins in both comparisons. **(E-F)** Major downregulated pathways using Kyoto Encyclopedia of Genes and Genomes (KEGG) pathway enrichment analysis. **(G-H)** Major upregulated KEGG pathways in both comparisons. **(I-J)** Venn diagrams showing common upregulated and downregulated pathways between Control vs DIO and DIO vs DIO *Nox2*-KO comparisons.

**Supplementary Figure S9.**

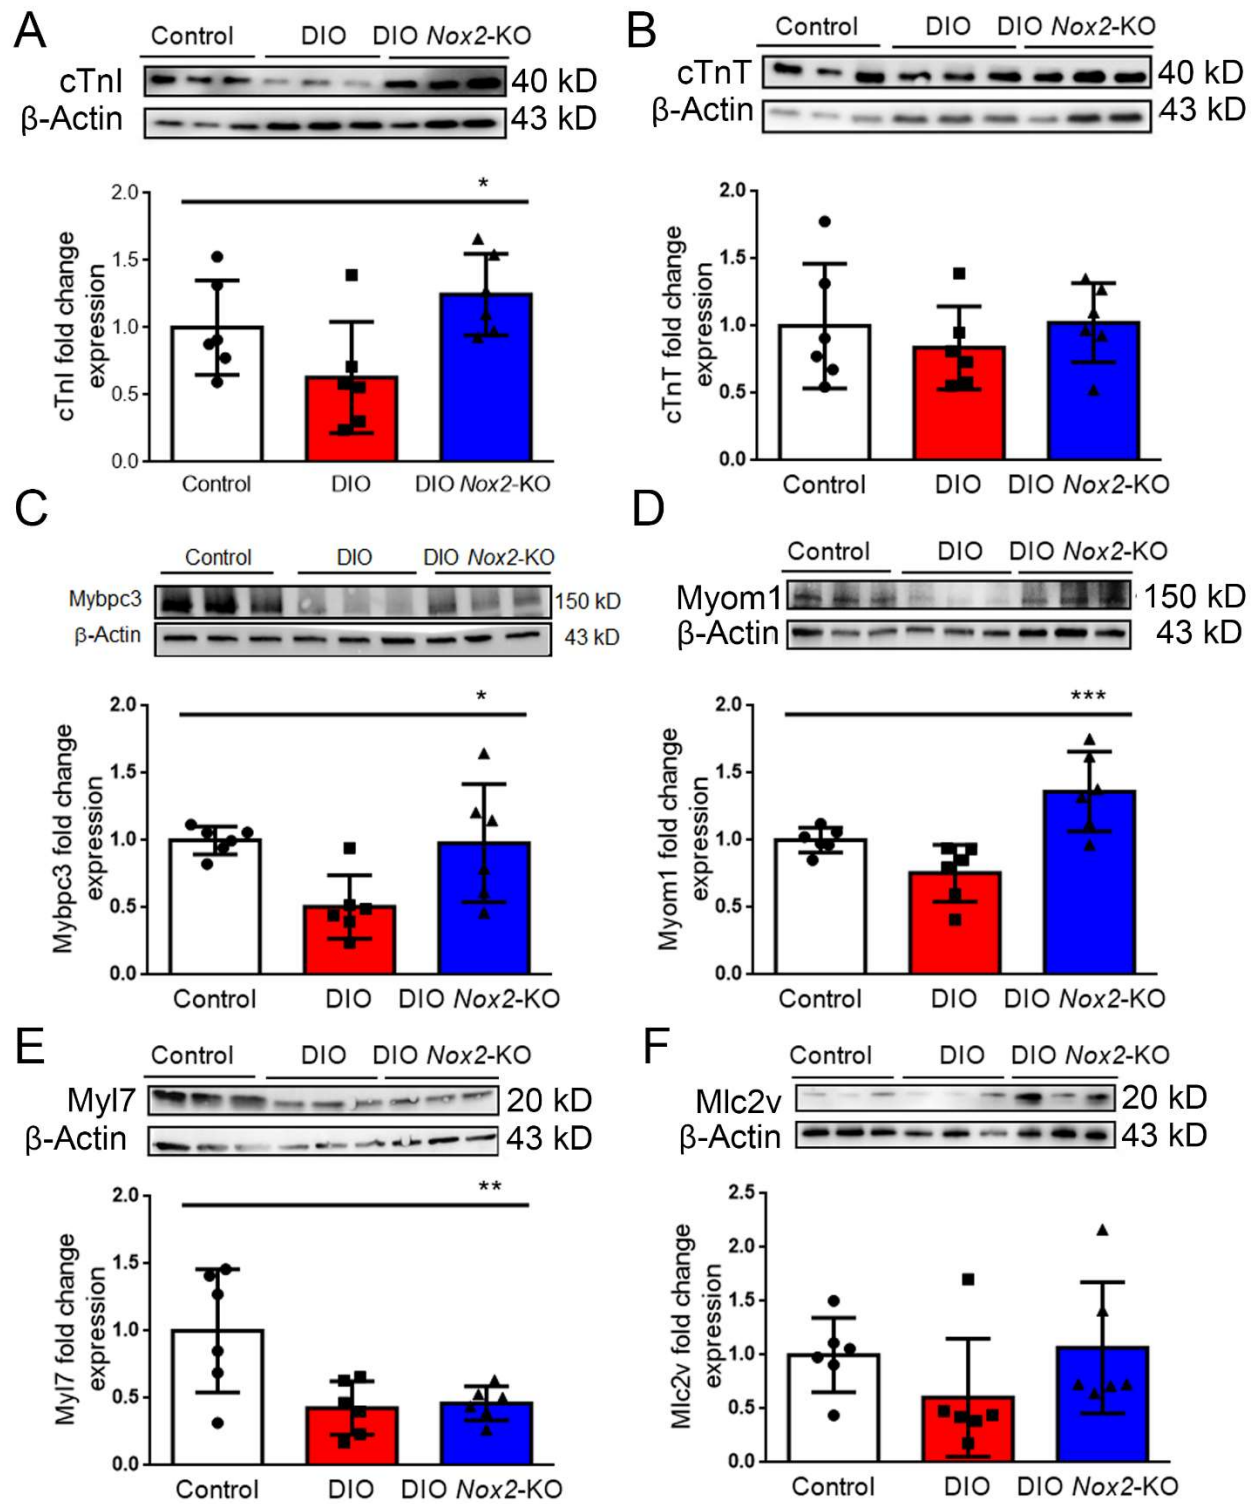

**Figure S9.** Western blot and quantification of proteins involved in the **Cardiac muscle contraction pathway (hsa04260)**. **(A)** Cardiac troponin T (**cTnT**) in Control, DIO, and DIO *Nox2*-KO (N=6 each). **(B)** Cardiac troponin I (**cTnI**) in Control, DIO, and DIO *Nox2*-KO (N=6 each). **(C)** Cardiac myosin binding protein C (**Mybpc3**) in Control, DIO, and DIO *Nox2*-KO (N=6 each). **(D)** Myomesin 1 (**Myom1**) in Control, DIO, and DIO *Nox2*-KO (N=6 each). **(E)** Myosin Light Chain 7 (**Myl7**) in Control, DIO, and DIO *Nox2*-KO (N=6 each). **(F)** Myosin Light Chain 2 (**Mlc2v**) in Control, DIO, and DIO *Nox2*-KO (N=6 each). Western blot and quantification of **Fatty acid metabolism pathway proteins (hsa0061)**. One-way ANOVA was used to compute statistical significance. \*P<0.05; \*\*P<0.01; \*\*\*\*P<0.0001.

# Supplementary Figure S10.

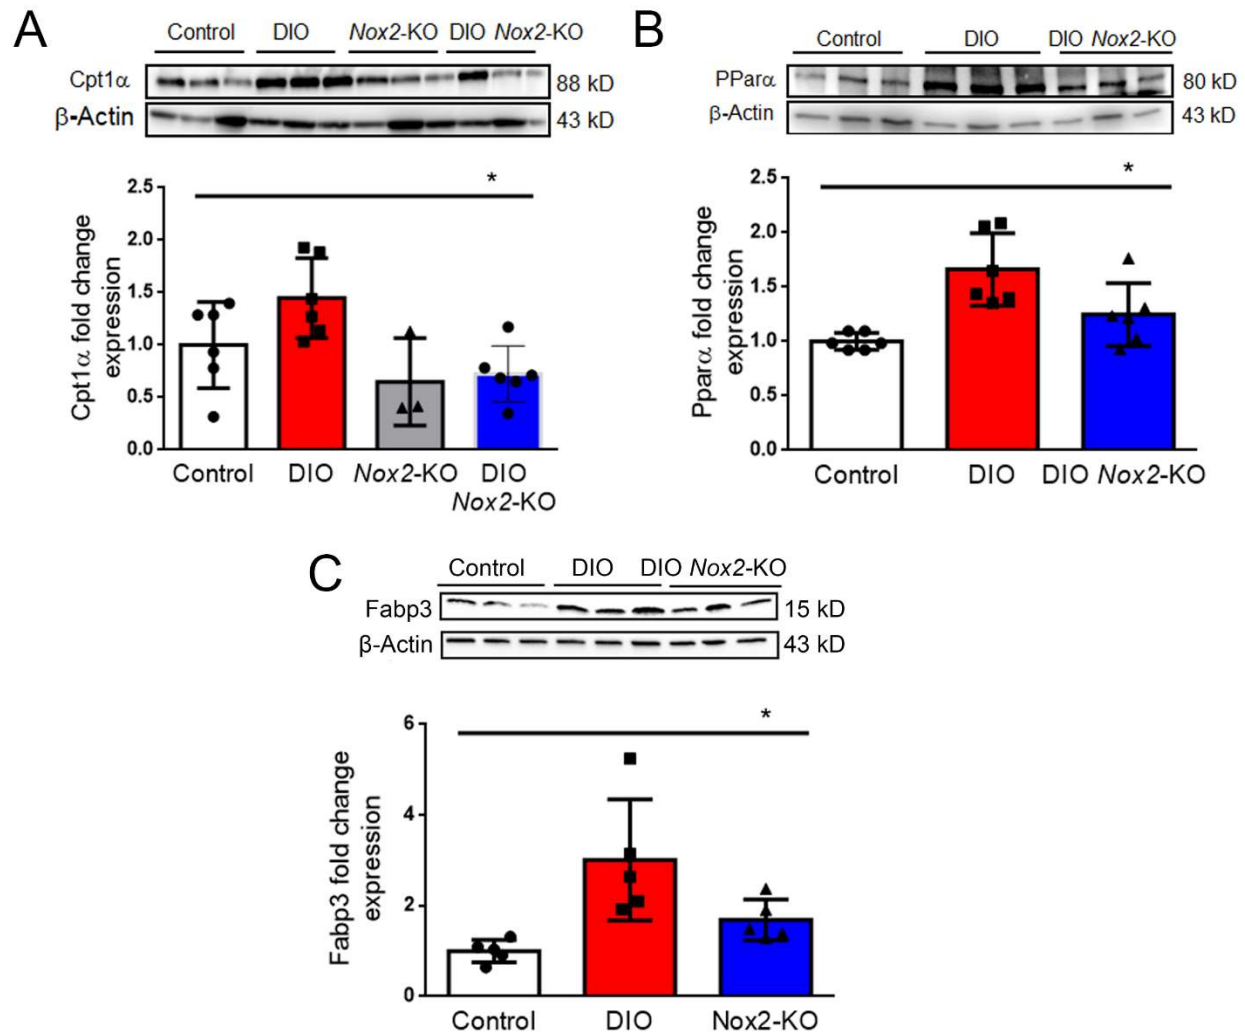

**Figure S10.** Western blot and quantification of proteins involved in the **Fatty acid metabolism**: **(A)** Carnitine palmitoyltransferase 1A (**Cpt1α**) in Control, DIO, DIO Nox2-KO (N=6 each), and Nox2-KO (N=3). **(B)** Peroxisome Proliferator Activated Receptor α (**Pparα**) in Control, DIO, and DIO Nox2-KO (N=6 each). **(C)** Heart type Fatty Acid Binding Protein 3 (**Fabp3**) in Control, DIO, and DIO Nox2-KO (N=6 each). One-way ANOVA was used to compute statistical significance. \*P<0.05; \*\*P<0.01; \*\*\*\*P<0.0001.

Supplementary Figure S11.

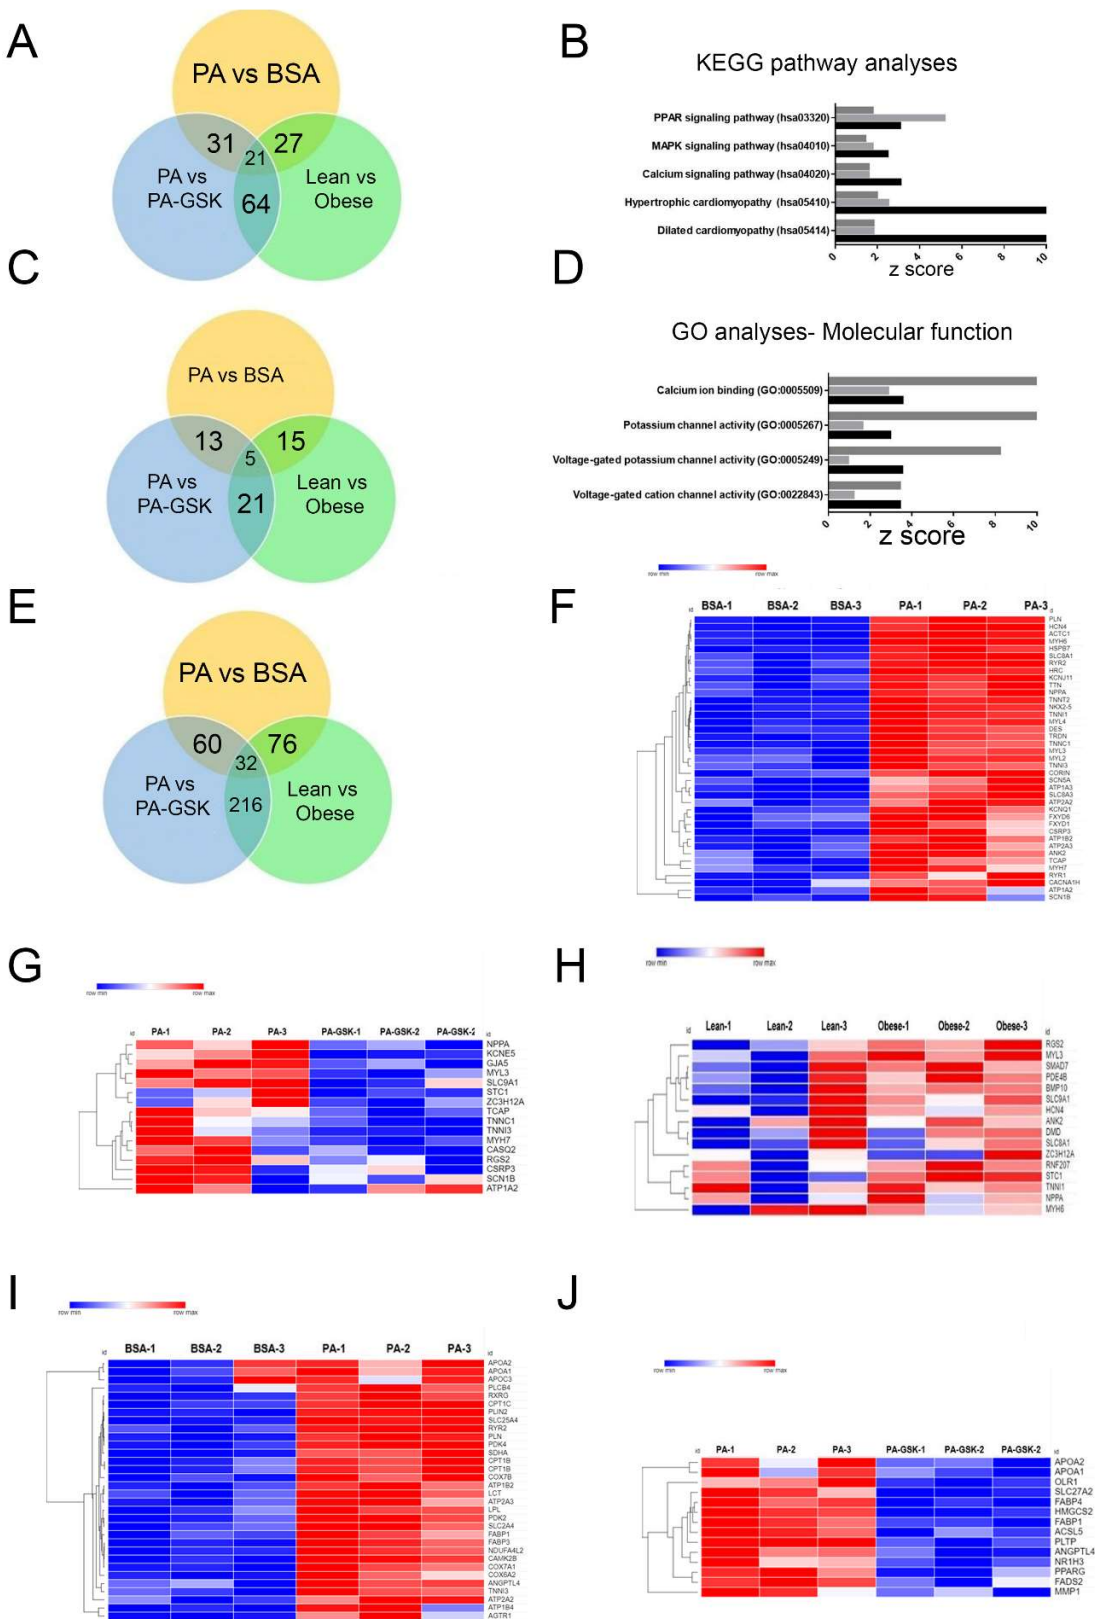

**Figure S11. Common RNAseq pathways from hiPSC-aCM and Human atrial tissue data sets**

**(A)** Venn diagram showing number of common upregulated KEGG pathways between BSA vs PA-hiPSC-aCMs, PA vs PA-GSK-hiPSC-aCMs, and lean vs obese human atrial tissues (HATs). **(B)** Common cardiac related upregulated KEGG pathways between the 3 comparisons. **(C)** Venn diagram showing number of common upregulated gene ontology (GO) molecular function pathways between BSA vs PA-hiPSC-aCMs, PA vs PA-GSK-hiPSC-aCMs, and lean vs obese HATs. **(D)** Common cardiac GO molecular function pathways pathways between the 3 comparisons. **(E)** Venn diagram showing number of common GO biological process pathways between BSA vs PA-hiPSC-aCMs, PA vs PA-GSK-hiPSC-aCMs, and lean vs obese HATs. **(F–H)** Heatmaps of top upregulated and downregulated DEGs associated with the key GO pathway- Regulation of heart contraction (GO0008016) in **(F)** BSA vs PA-hiPSC-aCMs, **(G)** PA vs PA-GSK-hiPSC-aCMs and **(H)** Lean vs Obese HATs. **(I–J)** Heatmaps of top upregulated and downregulated DEGs associated with the key KEGG pathway- PPAR signaling pathway in **(I)** BSA vs PA-hiPSC-aCMs and **(J)** PA vs PA-GSK-hiPSC-aCMs.

**Supplementary Figure S12.**

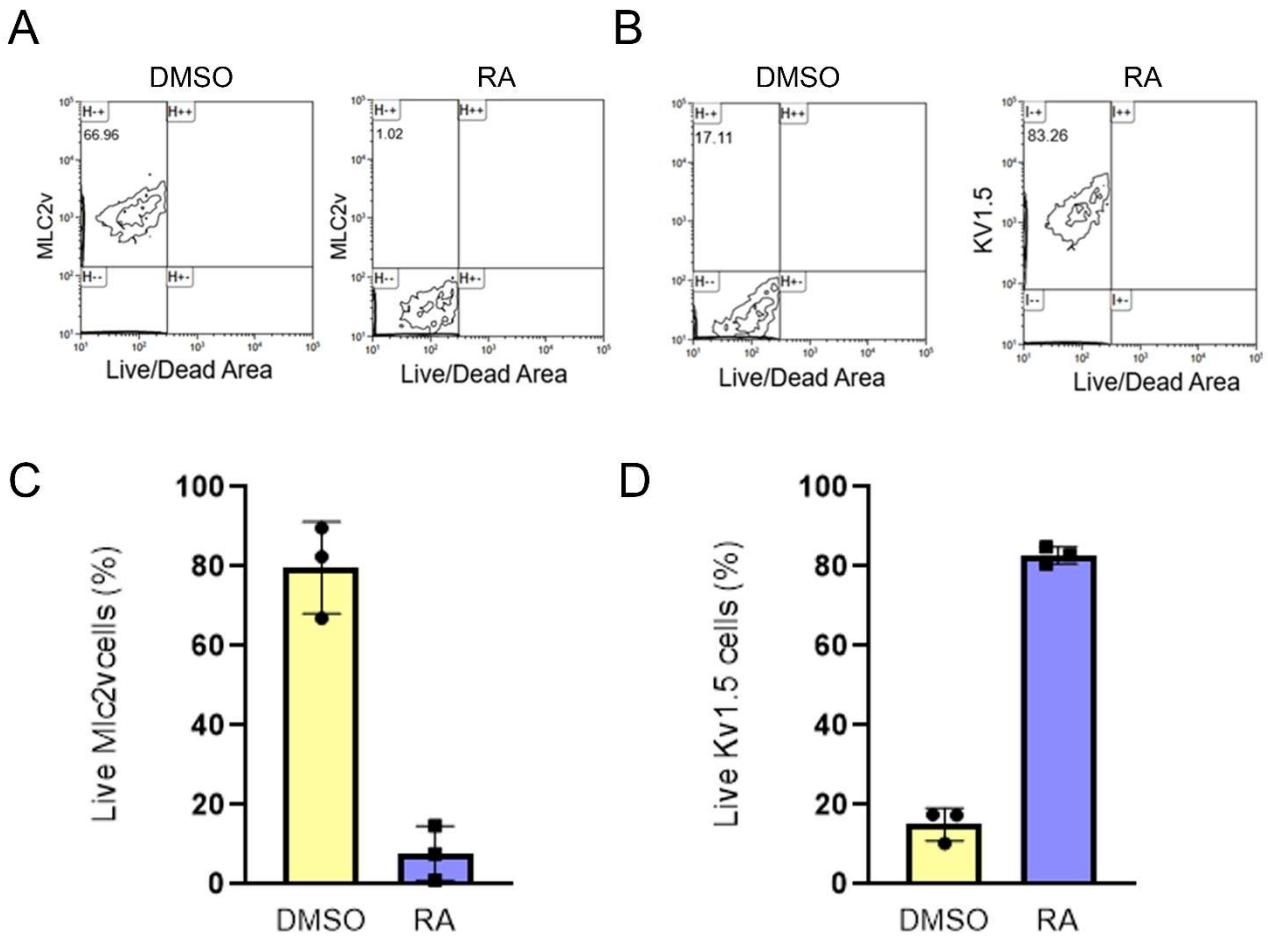

**Supplementary Figure S12. A:** Representative flow cytometry contour plots of RA-treated and dimethyl sulfoxide (DMSO; Control, N= 3) cells sorted into MLC2v positive and live fractions at day 10 (quadrant 1, upper left). **B:** Representative flow cytometry contour plots of RA-treated and CT cells sorted into Kv1.5 positive and live fractions at day 10 (quadrant 1, upper left). **(C-D)** Averaged flow cytometry data from three biological replicates for live MLC2v (C) and Kv1.5 (D) flow cytometry fractions, respectively, by 2-tailed, unpaired Student's *t* test.
